1 **A poxvirus decapping enzyme localizes to mitochondria to regulate RNA metabolism and**  
2 **translation, and promote viral replication**

3

4 Shuai Cao<sup>1,2</sup>, Joshua A Molina<sup>1,2</sup>, Fernando Cantu<sup>2</sup>, Candy Hernandez<sup>1</sup>, Zhilong Yang<sup>1,2\*</sup>

5

6 <sup>1</sup>Department of Veterinary Pathobiology, College of Veterinary Medicine & Biomedical  
7 Sciences, Texas A&M University, College Station, TX, USA

8 <sup>2</sup>Division of Biology, Kansas State University, Manhattan, KS, USA

9 \*Correspondence to: [zyang@cvm.tamu.edu](mailto:zyang@cvm.tamu.edu)

10

11

12

13

14

15

16

17

18

19

20

21

22

23

24

25

26

27 **Abstract**

28 Decapping enzymes remove the 5'-cap of eukaryotic mRNA, leading to accelerated RNA decay.  
29 They are critical in regulating RNA homeostasis and play essential roles in many cellular and life  
30 processes. They are encoded in many organisms and viruses, including vaccinia virus, which  
31 was used as the vaccine to eradicate smallpox. Vaccinia virus encodes two decapping  
32 enzymes, D9 and D10, that are necessary for efficient viral replication and pathogenesis.  
33 However, the underlying molecular mechanism regulating vaccinia decapping enzymes' function  
34 is still largely elusive. Here we demonstrated that vaccinia D10 localized almost exclusively to  
35 mitochondria that are highly mobile cellular organelles, providing an innovative mechanism to  
36 concentrate D10 locally and mobilize it to efficiently decap mRNAs. As mitochondria were barely  
37 present in "viral factories," where viral transcripts are produced, suggesting that mitochondrial  
38 localization provides a spatial mechanism to preferentially decap cellular mRNAs over viral  
39 mRNAs. We identified three amino acids responsible for D10's mitochondrial localization. Loss  
40 of mitochondrial localization significantly impaired viral replication, reduced D10's ability to  
41 resolve RNA 5'-cap aggregation during infection, diminished D10's gene expression shutoff and  
42 mRNA translation promotion abilities.

43

44 **Importance**

45 Decapping enzymes comprise many members from various organisms ranging from plants,  
46 animals, and viruses. The mechanisms regulating their functions vary and are still largely  
47 unknown. Our study provides the first mitochondria-localized decapping enzyme, D10, encoded  
48 by vaccinia virus that was used as the vaccine to eradicate smallpox. Loss of mitochondrial  
49 localization significantly impaired viral replication and D10's gene expression shutoff and mRNA  
50 translation promotion ability. Mitochondrial localization is a spatial mechanism to concentrate  
51 D10 locally and mobilize it to efficiently and preferentially target cellular mRNAs for decapping

52 and promote viral mRNA translation. Our results have broad impacts on understanding the  
53 functions and mechanisms of decapping enzymes.

54

55 **Keywords:** Decapping enzyme, poxvirus, vaccinia virus, mitochondria, translation, RNA decay

56

## 57 **Introduction**

58 The methyl guanosine cap (m<sup>7</sup>G) at the 5'-end of eukaryotic mRNA regulates many aspects of  
59 RNA processing and metabolism, such as splicing, transportation to the cytoplasm, protecting  
60 mRNA from 5'-3' degradation by exonucleases, and recruiting cap-dependent translation  
61 initiation factors [1]. Decapping enzymes are proteins with many known members that regulate  
62 mRNA stability through removing the 5'-cap to render RNA sensitive to exonuclease-mediated  
63 5'-3' digestion. They are critical for regulating the homeostasis of cellular mRNAs levels and  
64 play crucial roles in numerous cellular and life processes [2]. In humans and various model  
65 systems, decapping enzymes are involved in cell migration, development, and cancers [3-7].  
66 The active enzymatic activity of decapping enzymes lies in the Nudix motif with hydrolase  
67 activity, which hydrolyzes nucleoside diphosphate linked to other moieties [8]. The Nudix motifs  
68 are highly conserved and usually located in the center regions of the decapping enzymes [8].  
69 Positive and negative regulatory domains are typically presented at the N- and C-termini of the  
70 proteins, which bind to either RNAs or other proteins to regulate the substrate specificities and  
71 potentials of decapping enzymes [9-12].

72

73 Dcp2 was the first discovered decapping enzyme from budding yeast *Saccharomyces*  
74 *cerevisiae* [13], followed by numerous homologs found in other organisms, including humans  
75 and plants [4, 14-17]. The human genome encodes multiple decapping enzymes [18]. Dcp2  
76 carries out its catalytic activity in cytoplasmic structures called Processing bodies (P-bodies)  
77 [15]. P-bodies are cytoplasmic ribonucleoprotein (RNP) granules containing proteins involved in

78 RNA degradation, including decapping enzymes, exonuclease Xrn1, and proteins involved in  
79 the RNA interference pathway beside translationally repressed mRNAs [19]. Local  
80 concentrating Dcp2 and other related proteins in P-bodies increases RNA degradation potential  
81 [20]. However, different decapping enzymes likely have distinct substrate specificities and  
82 modes of action. For example, Nudt16 is a nuclear decapping enzyme with a high affinity for U8  
83 small nucleolar RNA [21]. Nudt12 is a cytoplasmic decapping enzyme that targets NAD<sup>+</sup>  
84 capped RNA[22]. Today, while much progress has been made to understand decapping  
85 enzymes, how they achieve different functions and their molecular mechanisms of action remain  
86 largely elusive.

87  
88 Interestingly, many viruses encode decapping enzymes, including poxviruses, Africa swine  
89 fever virus, and many other large nucleo-cytoplasmic DNA viruses [23-26]. Vaccinia virus  
90 (VACV), the vaccine used to eradicate the historically one of the most (if not the most)  
91 devastating infectious diseases, smallpox, encode two decapping enzymes, D9 and D10 [24,  
92 25]. VACV is the prototypic member of the poxviruses, a large family of double-stranded DNA  
93 viruses currently causing many severe diseases in humans and economically and ecologically  
94 important animals [27, 28]. Poxviruses are also actively developed for treating cancers and as  
95 vaccine vectors [28]. D10 is present in all sequenced poxviruses [25]. They have low similarities  
96 to human Dcp2. D9 and D10's decapping activities were demonstrated *in vitro* [24, 25]. They  
97 negatively regulate viral and cellular gene expression in VACV infected cells by accelerating  
98 mRNA turnover and are thought to be critical to controlling the VACV cascade gene expression  
99 program to ensure sharp transitions [29-33]. However, it is unclear if these viral decapping  
100 enzymes employ mechanisms to preferentially target cellular mRNAs in VACV-infected cells.  
101 VACV infection produces excessive RNAs, and some of them can form dsRNA to stimulate  
102 receptor 2'5'-oligoadenylate synthetase 2 (OAS)-RNase L pathway and PKR activation, which  
103 lead to RNA decay and mRNA translation repression, respectively. D9 and D10 are among the

104 essential viral factors to resolve excessive double-stranded RNA (dsRNA) produced in VACV  
105 infection to evade these antiviral immunities [34]. Our recent data identified another function of  
106 D9 and D10, which are required for efficient VACV mRNA translation during infection [35].  
107 Strikingly, D10 alone promotes viral mRNA translation in uninfected cells to ensure high levels  
108 of viral protein production [35]. Promoting mRNA translation by D10 is unusual as decapping  
109 enzymes are thought to negatively regulate RNA translation by competing with cap-binding  
110 translation initiation factors [19, 36-39]. However, how D10 promotes mRNA translation is still  
111 largely unknown.

112  
113 Here we demonstrated that D10 located almost exclusively to mitochondria, the first discovered  
114 among known decapping enzymes. We further identified the amino acids at the N-terminus of  
115 D10 that are critical for D10's mitochondrial localization. The mitochondrial localization of D10 is  
116 required for efficient viral replication, and D10's ability to regulate mRNA metabolism, translation  
117 promotion. The results indicate that mitochondria riding provides D10 a mechanism to  
118 concentrate proteins locally with remarkable mobility to preferentially decap cellular mRNAs  
119 during VACV infection.

120

## 121 **Results**

122

### 123 **VACV D10 localizes to mitochondria**

124 We examined D10's subcellular localization using a recombinant VACV vD10-3xFlag, in which  
125 D10 was tagged with a 3xFlag epitope at the C-terminus. We used primary human foreskin  
126 fibroblasts (HFFs) and HeLa cells and found that D10 almost exclusively localizes to  
127 mitochondria (**Fig 1AB, Fig S1**). A549DKO human lung carcinoma cell, in which the PKR and  
128 RNase L genes were knocked out via CRISPR/Cas9, is very useful in studying VACV  
129 decapping enzyme functions. It excludes the PKR and RNase L activation-related RNA

130 degradation and translation repression during decapping enzymes-inactivated VACV infection  
131 [34]. Again, D10 localized to mitochondria during infection as it colocalized with MitoTracker and  
132 Tom20, a well-known mitochondrial protein [40] (**Fig 1C, Fig. S2**). Another notable observation  
133 is that mitochondria barely reside in the viral factories (the cytoplasmic sites of viral replication  
134 with intensive DNA staining of viral DNA) (**Fig 1 A-C**). Using a plasmid expressing D10 with a C-  
135 terminal 3xFlag, we observed D10 localized to mitochondria in uninfected A549DKO and HeLa  
136 cells (**Fig 1D**). Together, our results demonstrate that VACV D10 localizes to mitochondria  
137 either during viral infection or in uninfected cells.  
138

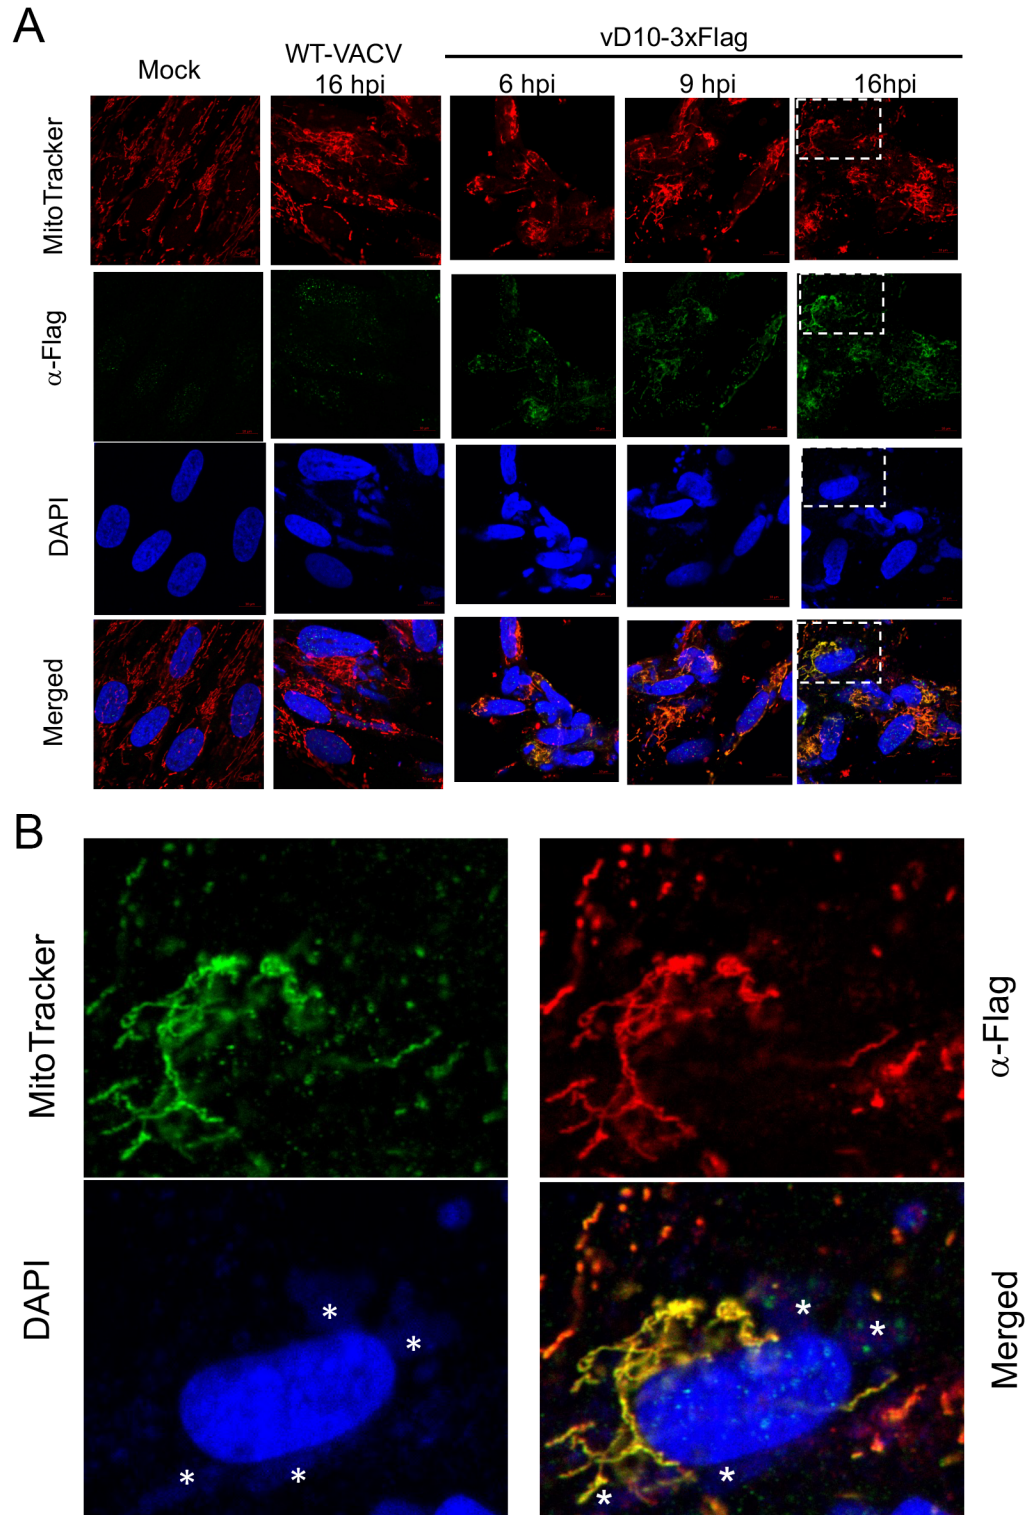

139

140

141

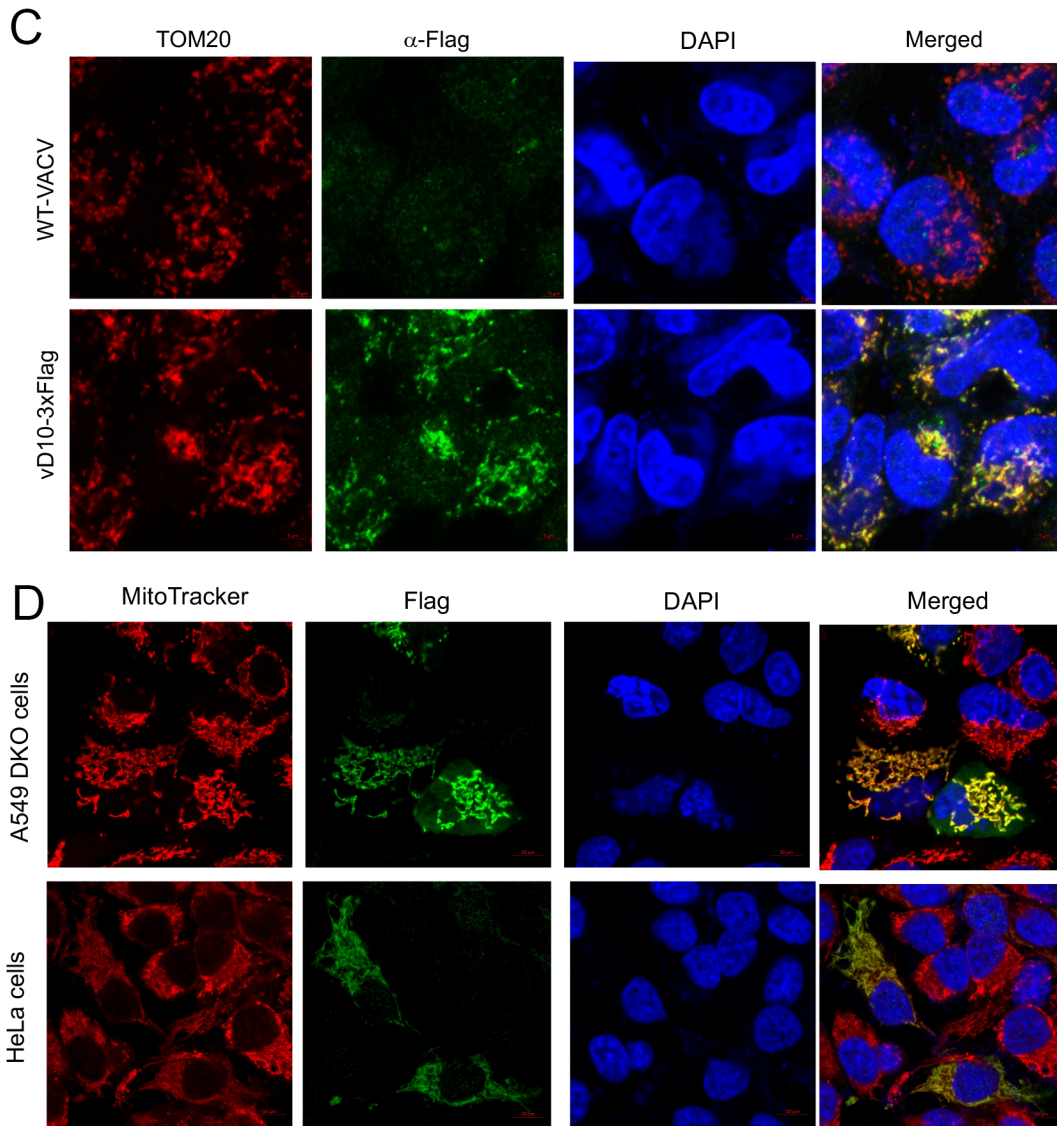

142

143 **Fig 1. VACV D10 localizes to mitochondria.**

144 **(A)** D10 localizes to mitochondria in HFFs during VACV infection. HFFs were infected with  
145 vD10-3xFlag, or WT-VACV (MOI=3), or mock-infected. Confocal microscopy was used to  
146 visualize D10 ( $\alpha$ -Flag antibody, green), mitochondria (MitoTracker, red), and DNA (DAPI, blue)  
147 at 6, 9, and 16 hpi (hours post-infection). **(B)** Zoomed in the indicated areas in A. The asterisks  
148 (\*) indicate viral factories. **(C)** D10 localizes to mitochondria in A549DKO cells during VACV  
149 infection. A549DKO cells were infected with vD10-3xFlag or WT-VACV (MOI=3). Confocal  
150 microscopy was employed to visualize D10 (anti-Flag antibodies, green), mitochondria ( $\alpha$ -



151 Tom20 antibody, red), DNA (DAPI, blue) at 16 hpi. **(D)** D10 localizes to mitochondria in  
152 uninfected cells, A549 DKO or HeLa cells were transfected with plasmid encoding codon-  
153 optimized D10 with a C-terminal 3xFlag tag. Confocal microscopy was used to visualize D10 ( $\alpha$ -  
154 Flag antibody, green), mitochondria (MitoTracker, red), and DNA (DAPI, blue) at 24 hours post-  
155 transfection.

156

### 157 **Identification of N-terminal hydrophobic amino acids required for D10 mitochondrial** 158 **localization**

159 We first generated and tested plasmids expressing a D10 C-terminal (D10- $\Delta$ C57) and a D10 N-  
160 terminal (D10- $\Delta$ N50) truncation mutants, respectively (**Fig 2A**). While D10- $\Delta$ C57 remained to  
161 localize to mitochondria, the D10- $\Delta$ N50 lost its mitochondrial localization ability (**Fig 2B**),  
162 suggesting that the N-terminal amino acids are required for D10 mitochondrial localization.  
163 Further truncations of D10 indicated that the N-terminal amino acids from 9 to 13 are needed for  
164 D10 localization to mitochondria because deletion of the first eight N-terminal amino acids did  
165 not fully block D10 mitochondria localization. In contrast, deletion of the first N-terminal 13  
166 amino acids rendered D10 loss its mitochondrial localization (**Fig 2A, Fig S3**). We further tested  
167 two additional D10 mutants: D10- $\Delta$ 9-13, in which the three amino acids from 9-13 (ISQII) were  
168 deleted, and D10-I9/12/13T, in which the hydrophobic Isoleucine (I) at 9, 12, 13 were changed  
169 to Threonine (T, neutral) (**Fig. 2A**). The rationale of the latter is that those hydrophobic residues  
170 that can form helix may interact with mitochondrial proteins or target mitochondrial membrane to  
171 dock D10 on mitochondria. The deletion mutant (D10- $\Delta$ 9-13) largely, while the point mutation  
172 mutant (D10-I9/12/13T) entirely rendered D10 to lose its mitochondrial localization in uninfected  
173 cells (**Fig 2B**).

174

175 We then constructed two recombinant VACVs: vD10-I9/12/13T and vD10- $\Delta$ 9-13, in which the  
176 D10 amino acids from 9 to 13 (ISQII) were mutated to TSQTT or deleted, respectively, yet both  
177 contained 3xFlag tag at the C-terminal. Interestingly, in both cases, the mutated D10 diffused in  
178 the infected A549 DKO or HeLa cells but did not localize to mitochondria, using Tom20 or  
179 Mitotracker to stain the mitochondria (**Fig 2C, Fig S4, Fig S5**). In addition, Western blotting  
180 analysis showed comparable protein levels of D10 and its mutants produced from the  
181 recombinant viruses (**Fig 2D**). These results corroborate that the N-terminal amino acids ISQII  
182 are required for D10 localization to mitochondria.

183

184

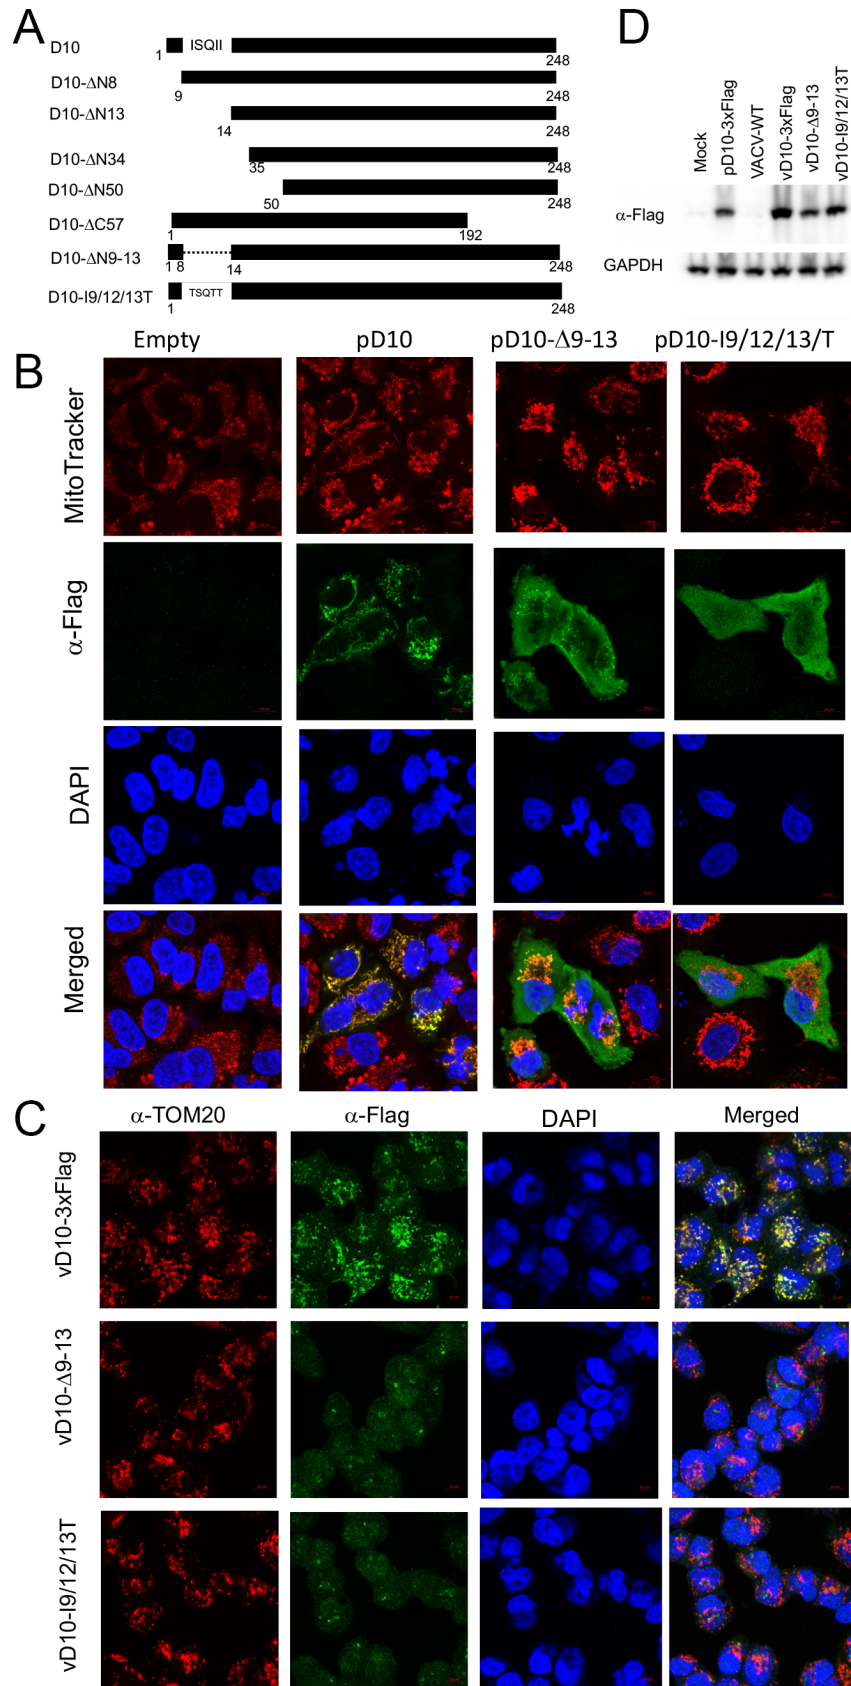

186 **Fig. 2. Three Isoleucines located at the N-terminal hydrophobic region of D10 are**  
187 **required for its mitochondrial localization.**

188 **(A)** Schematic of D10 mutants used in this study. **(B)** The hydrophobic amino acids Isoleucines  
189 located at the N-terminus of D10 are critical for D10 localization to mitochondria. A549 DKO  
190 cells were transfected with a plasmid expressing indicated codon-optimized D10 truncation  
191 mutants with a C-terminal 3xFlag. Confocal microscopy was employed to visualize D10 or its  
192 mutants using  $\alpha$ -Flag antibody (green), mitochondria (MitoTracker, red), and DNA (DAPI, blue)  
193 at 24 h post-transfection. **(C)** D10 with amino acids 9-13 deletion or mutation expressed from  
194 recombinant VACV does not localize to mitochondria during infection, A549DKO cells were  
195 infected with indicated recombinant VACVs (MOI=3) encoding D10 mutants with a C-terminal  
196 3xFlag tag. Confocal microscopy was used to visualize D10 ( $\alpha$ -Flag antibody, green),  
197 mitochondria ( $\alpha$ -Tom20, red), and DNA (DAPI, blue) at 16 hpi. **(D)** The levels of D10 or its  
198 mutants expressed from recombinant VACVs are expressed at comparable levels. A549DKO  
199 cells were infected with indicated viruses (MOI=3) or mock-infected. Western blotting analysis  
200 was employed to examine 3xFlag-tagged D10 expression using  $\alpha$ -Flag antibody.

201

202 **Loss of D10 mitochondrial localization impairs VACV replication**

203 Next, we examined the impact of D10 mitochondrial localization on VACV replication by  
204 comparing the replication of vD10- $\Delta$ 9-13 and vD10-I9/12/13T to vD10-3xFlag, a control VACV  
205 encoding wild-type (WT) D10 with a 3xFlag tag at its C-terminus. v $\Delta$ D10 is a recombinant VACV  
206 with D10 knocked out, and vD10mu is a recombinant VACV with D10's decapping enzyme  
207 inactivated by mutating its Nudix motif [31], were included in the experiments. We used both  
208 A549 control and A549DKO cells as Liu et al. had shown that A549DKO cells could better  
209 support decapping enzyme inactivated VACV replication [34]. The A549 control cells were  
210 generated in parallel with A549DKO cells but with no PKR and RNase L knocked out [34]. All

211 the recombinant viruses with mutated or deleted D10 replicated at a lower rate for a multiplicity  
212 of infection (MOI) of 3 and 0.001. The vD10-I9/12/13T more closely mimicked v $\Delta$ D10 with more  
213 severe effects (~3-fold higher decrease in both A549 control and A549DKO cells: 6- vs. 2.5-fold  
214 at MOI of 3 and up to 15- vs. 5-fold at MOI of 0.001 at 4 hpi) on viral yields and replication  
215 kinetics than that of vD10mu and vD10- $\Delta$ 9-13 (**Fig 3A-D**). In addition, the reductions of VACV  
216 replication for all the tested mutant viruses were more prominent in A549 control cells than in  
217 A549DKO cells (**Fig 3A-D**). Interestingly, in BHK-21 cells, the decrease of D10 mutant viruses  
218 was similar to that in A549DKO cells with only moderate effects (**Fig S6**).  
219

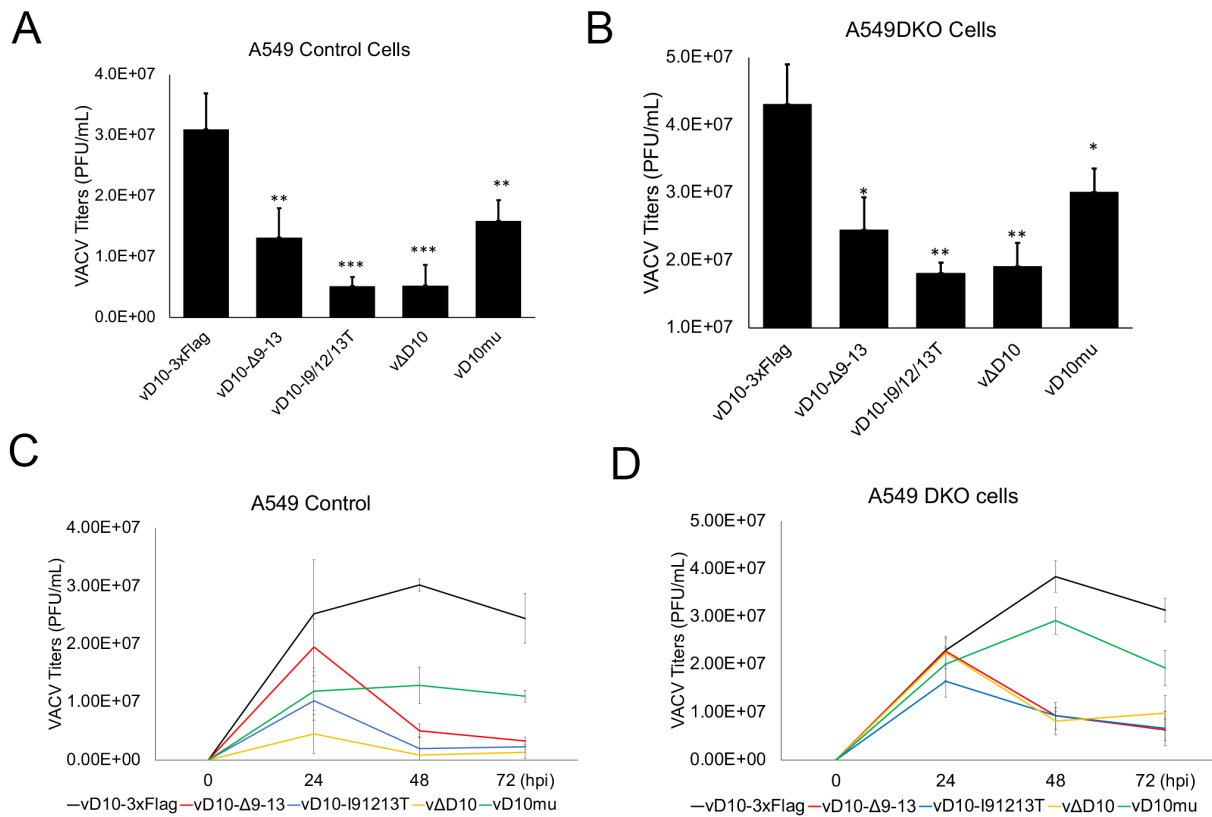

220

221 **Fig 3. Loss of D10 mitochondrial localization impairs VACV replication in the presence of**  
222 **D9.**

223 **(AB)** A549 control **(A)** or A549DKO cells **(B)** were infected with indicated viruses at an MOI of 3.

224 **(CD)** A549 control **(C)** or A549DKO cells **(D)** were infected with indicated viruses at an MOI of  
225 0.001. Viral titers were determined using a plaque assay at indicated times post-infection. All the  
226 viruses used encode D9. Error bars represent the standard deviation of at least three replicates.  
227 ns,  $P > 0.05$ ; \*\*,  $P \leq 0.01$ ; \*\*\*,  $P \leq 0.001$ . Significance was compared to vD10-3xFlag.  
228  
229 VACV-encoded two decapping enzymes, D9 and D10, have overlapping functions [24, 25]. We  
230 rationalized that the loss of D10 mitochondrial localization has a more prominent effect on  
231 VACV replication in the absence of D9 expression. We generated a recombinant VACV v $\Delta$ D9-  
232 D10-I9/12/13T, in which the D9 was knocked out and compared its replication with v $\Delta$ D9 (D9  
233 knocked out, wild type D10). We included vD10-3xFlag and vD9muD10mu (in which the  
234 decapping activities of both D9 and D10 are deactivated [32]) in this experiment. Consistent with  
235 a previous report [31], the replication of v $\Delta$ D9 was not or only slightly affected in A549 control  
236 and A549DKO cells at MOI of 3 and 0.001, while vD9muD10mu barely replicated in A549  
237 control cells but could replicate at some levels in A549DKO cells (**Fig 4A-D**). Notably, compared  
238 to v $\Delta$ D9, v $\Delta$ D9-D10-I9/12/13T showed an 83-fold and 11-fold reduction of viral yield at MOI of 3  
239 in A549 control and A549DKO cells, respectively (**Fig 4AB**). At MOI of 0.001, v $\Delta$ D9-D10-  
240 I9/12/13T replication also showed an 18-fold and 11-fold reduction of viral yields at its  
241 replication peaks in A549 control and A549DKO cells, respectively (**Fig 4CD**). A comparison of  
242 the plaque sizes indicated that v $\Delta$ D9-D10-I9/12/13T and v $\Delta$ D9-D10 $\Delta$ 9-13 have significantly  
243 smaller plaques than vD10-3xFlag (**Fig 4EF**). The plaque sizes of v $\Delta$ D10 and vD10-I9/12/13T  
244 were also smaller than vD10-3xFlag (**Fig 4EF**).  
245  
246 Overall, we conclude that D10 mitochondrial localization is required for efficient VACV  
247 replication in both PKR- and RNase L-dependent and independent manners.  
248

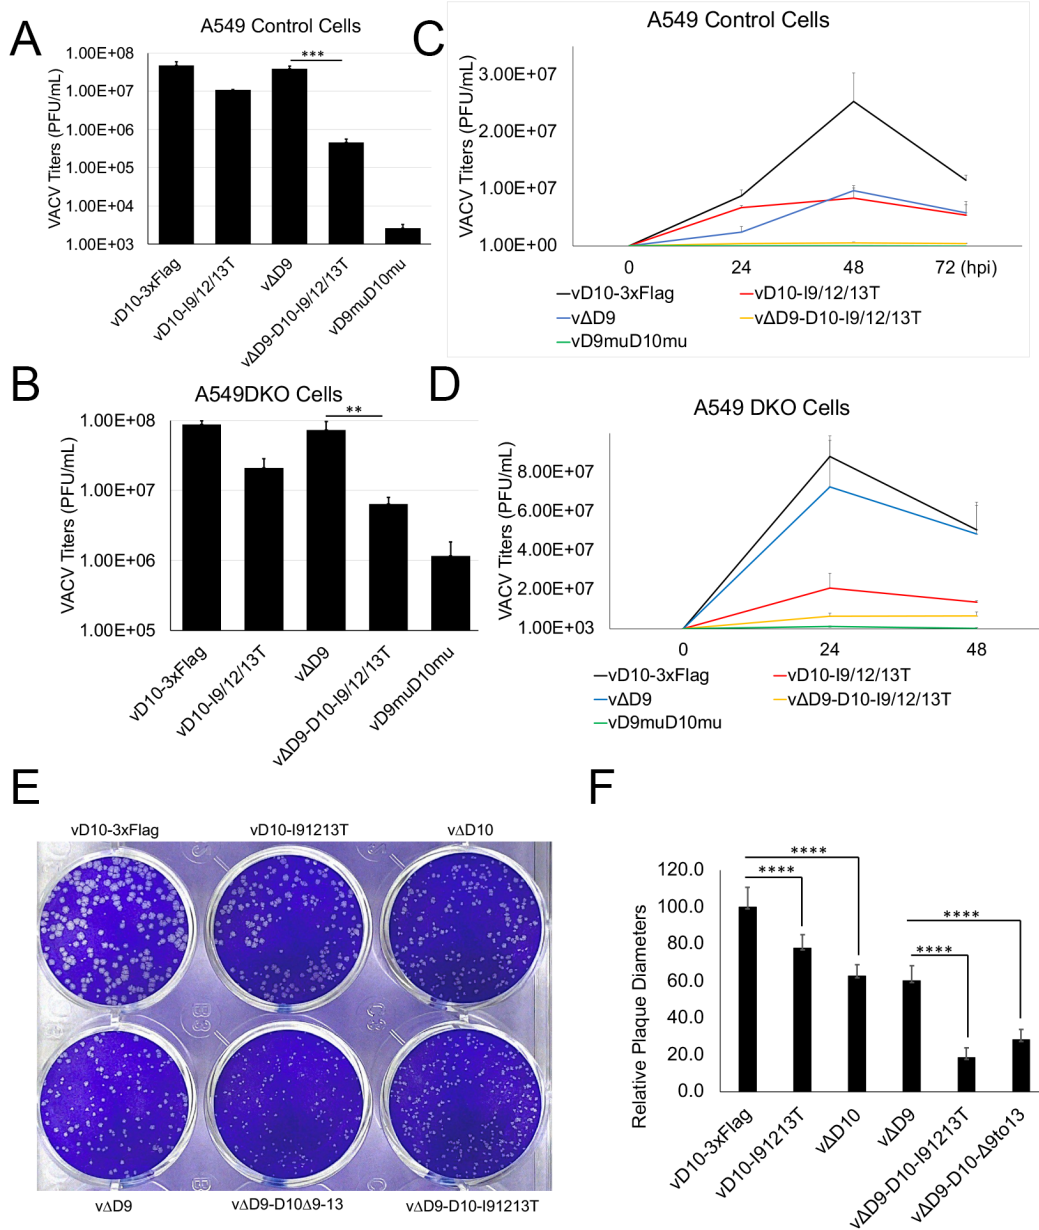

249

250 **Fig. 4. Loss of D10 mitochondrial localization significantly impairs VACV replication in**  
 251 **the absence of D9 expression.**

252 **(A-D)** A549 control **(AC)** or A549DKO cells **(BD)** were infected with indicated viruses at an MOI  
 253 of 3 **(AB)** or 0.001 **(CD)**. D9 was knocked out in vΔD9 and vΔD9-D10-I9/12/13T. Viral titers were  
 254 determined using plaque assay at indicated times post-infection. Error bars represent the  
 255 standard deviation of at least three replicates. **(E)** Loss of D10 mitochondrial localization

256 reduced VACV plaque sizes. BS-C-1 cells were infected with indicated viruses. Plaques were  
257 visualized by a plaque assay. **(F)** Diameters from 25 plaques were measured using Image J and  
258 plotted. The diameters of vD10-3xFlag plaques were normalized to 100. \*\*,  $P \leq 0.01$ ; \*\*\*,  $P \leq$   
259 0.001; \*\*\*\*,  $P \leq 0.0001$ .

260

## 261 **Loss of D10 mitochondrial localization reduces viral protein production during VACV** 262 **infection**

263 Our results (**Figs 3&4**) demonstrated that the effect of D10 mitochondrial localization on VACV  
264 replication could be more readily observed in the absence of D9. We then compared viral  
265 protein expression levels of v $\Delta$ D9, v $\Delta$ D9-D10-I9/12/13T, and vD9muD10mu during infection.

266 While more or similar levels of viral early (E3) and intermediate (D13) proteins from v $\Delta$ D9-D10-  
267 I9/12/13T and vD9muD10mu to that from v $\Delta$ D9 infection were detected before 8 hpi, we  
268 observed substantially less intermediate (D13) and late (A7) viral protein levels at 16 and 24 hpi  
269 from v $\Delta$ D9-D10-I9/12/13T and vD9muD10mu infection (**Fig 5AE**). Similarly, we observed  
270 substantially less total viral protein production from v $\Delta$ D9-D10-I9/12/13T and vD9muD10mu  
271 infection than v $\Delta$ D9 infection (**Fig 5AE**). There are two other notable observations: (1) the  
272 reduction of viral protein production during late infection was more prominent, (2) the extent of  
273 protein production reduction was less in  $\Delta$ D9-D10-I9/12/13T than in vD9muD10mu infection (**Fig**  
274 **5AE**).

275

276 To determine if the protein synthesis reduction was correlated to viral mRNA levels, we carried  
277 out quantitative real-time PCR (qRT-PCR) to measure E3L, D13L, and A7L mRNAs at 4, 8, 16,  
278 and 24 hpi. In A549 control cells, while the E3L, D13L, and A7L mRNA levels continued to  
279 increase over the course of VACV infection, a notable increase of these mRNAs was not  
280 observed in v $\Delta$ D9-D10-I9/12/13T and vD9muD10mu infection. Notably, at 24 hpi, D13L and A7L



281 mRNA levels in v $\Delta$ D9-D10-I9/12/13T and vD9muD10mu infection were significantly lower than  
282 in v $\Delta$ D9 infection (**Fig 5B-D**), likely due to the activation of RNase L RNA degradation pathway  
283 [34]. Interestingly, we observed generally higher E3L, D13L, and A7L mRNA levels in v $\Delta$ D9-  
284 D10-I9/12/13T and vD9muD10mu infection than v $\Delta$ D9 in A549DKO cells from 8 hpi (**Fig 5F-H**).  
285 It has been shown that inactivation of D9 and D10 decapping activities stimulates PKR  
286 activation, followed by eIF2 $\alpha$  phosphorylation [32], leading to translation repression. We  
287 compared eIF2 $\alpha$  phosphorylation in v $\Delta$ D9 and v $\Delta$ D9-D10-I9/12/13T infected cells and observed  
288 higher eIF2 $\alpha$  phosphorylation in v $\Delta$ D9-D10-I9/12/13T-infected A549 control cells but not  
289 A549DKO cells (**Fig 5I**), which likely contributed to the more severe protein production defect in  
290 A549 control cells (**Fig 5AB**). Since protein levels from v $\Delta$ D9-D10-I9/12/13T infection were  
291 lower than that from v $\Delta$ D9 infection, and PKR is not present in A549DKO cells (**Fig. 5E**), it  
292 suggests an additional translational disadvantage due to the loss of mitochondrial localization  
293 independent of PKR activation-induced translation suppression.

294

295 Together, these results demonstrate that loss of mitochondrial localization substantially  
296 decreases viral protein production in both A549 control and DKO cells. However, loss of  
297 mitochondrial localization leads to higher levels of viral mRNAs were observed in A549DKO  
298 cells but not in A549 control cells, again suggesting PKR- and RNase L-dependent and  
299 independent mechanisms.

300

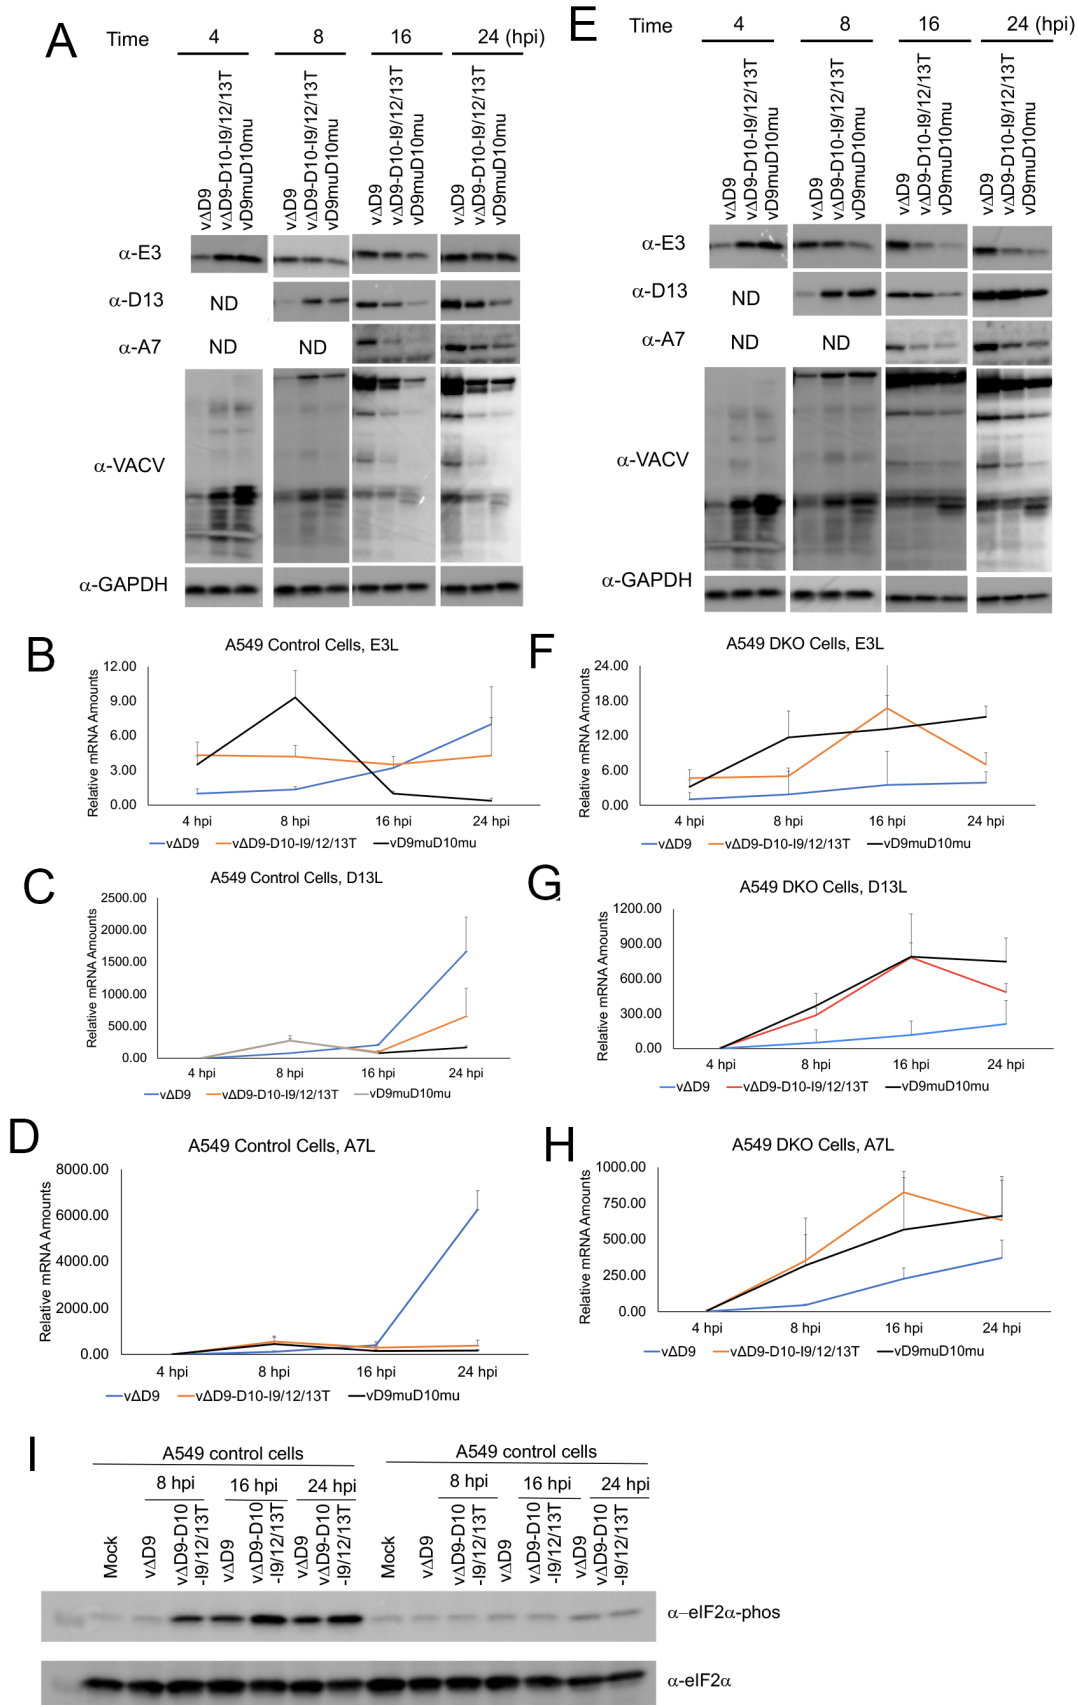

302 **Fig. 5. Loss of D10 mitochondrial localization reduces viral protein production during**  
303 **VACV infection.**  
304 **(AE)** A549 control **(A)** or A549DKO cells **(E)** were infected with indicated viruses at an MOI of 3.  
305 Viral proteins were detected using indicated antibodies at indicated times post-infection.  
306 GAPDH was used as a loading control. E3, D13, and A7 are viral early, intermediate, and late  
307 proteins, respectively. **(BCD)** A549 control cells were infected with indicated viruses at an MOI  
308 of 3. Relative levels (to cellular 18S) of viral mRNAs were quantified using qRT-PCR. **(B)** E3L  
309 (early), **(C)** D13L (intermediate), **(D)** A7L (late). The mRNA levels were normalized to the level  
310 at 4 hpi in v $\Delta$ D9-infected cells for each mRNA. **(FGH)** A549 control cells were infected with  
311 indicated viruses at an MOI of 3. Relative levels (to cellular 18S) of viral mRNAs were quantified  
312 using qRT-PCR. **(F)** E3L (early), **(G)** D13L (intermediate), **(H)** A7L (late). The mRNA levels were  
313 normalized to the level at 4 hpi in v $\Delta$ D9-infected cells for each mRNA. Error bars represent the  
314 standard deviation of at least three replicates. **(I)** Western blotting analysis of eIF2 $\alpha$   
315 phosphorylation in A549 control and A549DKO cells infected with indicated viruses at indicated  
316 times post-infection.

317

318 **Loss of mitochondrial localization reduces D10's gene expression shutoff ability**  
319 Both D9 and D10's decapping activities are inactivated in vD9muD10mu [32]. In A549 control  
320 cells, the RNase L RNA degradation pathway was activated during VACV infection that explains  
321 lower viral mRNA levels in vD9muD10mu infection than in v $\Delta$ D9 infection. However, in  
322 A549DKO cells, the knockout of RNase L inactivates the pathway, which leads to viral mRNA  
323 accumulation in vD9muD10mu infection [32, 34]. Our results in **Fig 5** indicate that v $\Delta$ D9-D10-  
324 I9/12/13T closely mimics D9muD10mu for the effects on VACV mRNA levels, suggesting that  
325 the loss of mitochondrial localization may impair its ability to induce mRNA turnover. Because  
326 decapping enzymes remove 5'-m<sup>7</sup>G cap from mRNA, we employed an immunofluorescence

327 assay to visualize mRNA 5'-caps in cells using  $\alpha$ -cap antibodies. We used A549DKO cells as it  
328 supports the replication of VACV with inactivated decapping enzymes. In mock- and wild-type  
329 VACV-infected A549DKO cells, the caps distributed in the cells mostly evenly with no  
330 aggregation (**Fig 6A**). Strikingly, heavy aggregation of the 5'-caps was observed in almost all  
331 cells infected with vD9muD10mu. The aggregation was located primarily between the nuclei and  
332 viral factories (VACV DNA replication site in the cytoplasm with intensive DAPI staining) (**Fig**  
333 **6A**). The aggregation of the cap indicates the inability of vD9muD10mu to remove RNA 5'-cap  
334 during infection. We then investigated the impacts of mitochondrial localization loss on m<sup>7</sup>G-cap  
335 aggregation in the presence or absence of D9 expression during VACV infection (**Fig. 6BC**). In  
336 the presence of D9, loss of D10 mitochondrial localization or D10 deletion slightly increased the  
337 number of cells with 5-cap aggregation, with 4% and 2.5% of cells with aggregation (**Fig 6B**).  
338 Notably, in the absence of D9 expression, the loss of D10 mitochondrial localization  
339 substantially increased the cap aggregation during infection, with 26% and 20% of cells for  
340 v $\Delta$ D9-I9/12/13T and v $\Delta$ D9- $\Delta$ D109-13, respectively (**Fig 6C**).

341  
342 These results (**Figs 5 & 6B**) suggest that mitochondrial localization is required for efficient  
343 decapping in cells, which leads to RNA degradation and gene expression shutoff. We employed  
344 a virus-free approach to test if loss of mitochondrial localization impairs D10's ability to induce  
345 gene expression shutoff in cells without interference from other viral factors. We co-transfected  
346 plasmids encoding codon-optimized D10 or its mutants with a Gaussia luciferase reporter  
347 plasmid under a cellular EF-1a promoter. As expected, WT D10 potently decreased Gaussia  
348 luciferase activity by 7.8-fold (**Fig 6D**). Very interestingly, co-transfection of a plasmid  
349 expressing D10-I9/12/13T could only reduce Gaussian luciferase expression by 1.7-fold (**Fig**  
350 **6D**). D10 $\Delta$ 9-13 and D10mu (with Nudix domain mutation) lost their ability to suppress Gaussia  
351 luciferase expression (**Fig 6D**). The protein expression levels of D10 and its mutants from

352 plasmids were comparable, although D10 $\Delta$ 9-13 showed a slower migration when expressed  
353 from a plasmid (**Fig 6E**). Taken together, our results indicate that loss of mitochondrial  
354 localization reduces D10's ability to remove mRNA 5'-caps and shut off gene expression.  
355

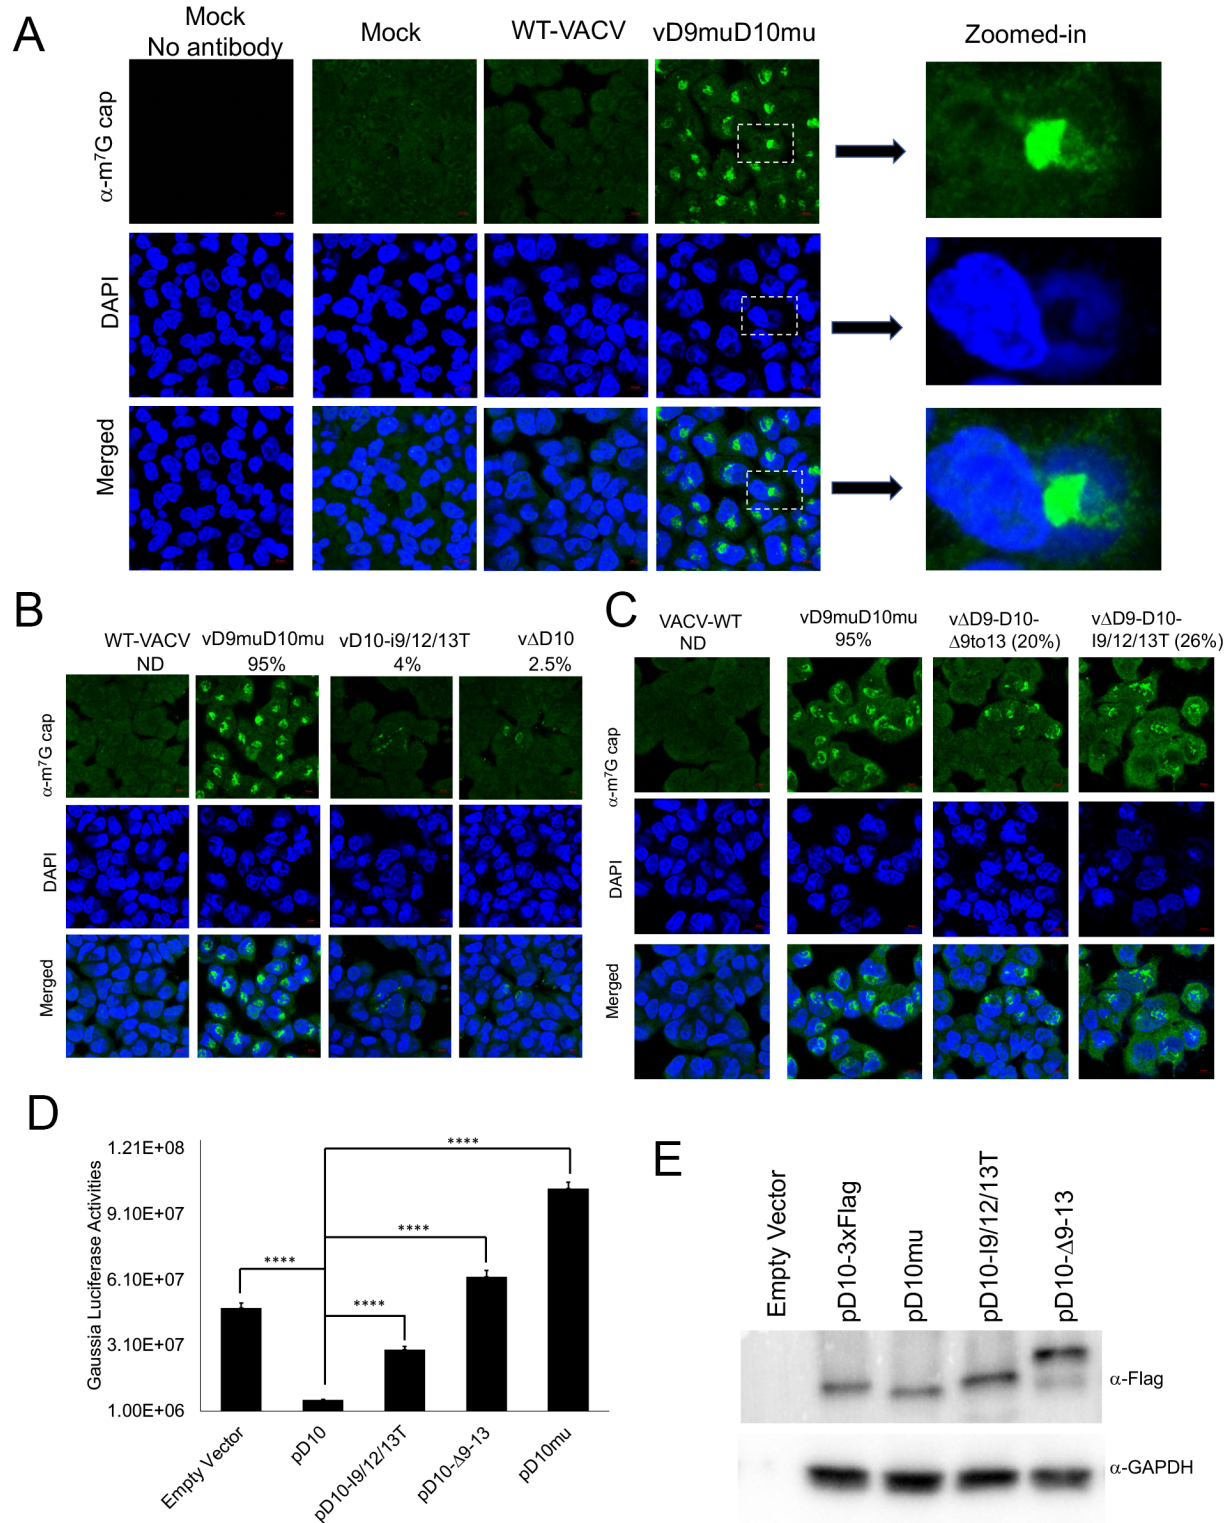

356

357 **Fig. 6. Loss of mitochondrial localization reduces D10's gene expression shutoff ability.**

358 **(A)** Inactivation of D9 and D10's decapping activities leads to aggregation of m<sup>7</sup>G cap structures  
359 in VACV-infected cells. A549DKO cells were infected with WT, vD9muD10mu (MOI=3), or  
360 mock-infected. Confocal microscopy was used to visualize m<sup>7</sup>G cap ( $\alpha$ -cap antibody, green)  
361 and DNA (DAPI, blue) at 16 hpi. Three zoomed-in areas were shown on the right. The asterisks  
362 (\*) indicate viral factories. **(BC)** Loss of mitochondrial localization leads to aggregation of the  
363 caps in VACV infected cells. A549 DKO cells were infected with indicated viruses at an MOI of  
364 3. Confocal microscopy was used to visualize m<sup>7</sup>G cap ( $\alpha$ -cap antibody, green) and DNA (DAPI,  
365 blue) at 16 hpi. The numbers indicate the percentages of cells with cap aggregation. **(D)** Loss of  
366 D10 mitochondrial localization reduces its ability to shut off gene expression. Gaussia luciferase  
367 reporter gene under a cellular EF-1a promoter was co-transfected with the indicated codon-  
368 optimized D10 or D10 mutants. Gaussia luciferase activities were measured 24 h post-  
369 transfection. **(E)** Western blotting analysis of D10 and D10 mutant protein levels. Error bars  
370 represent the standard deviation of at least three replicates. \*\*\*\*,  $P \leq 0.0001$ .

371

### 372 **Loss of mitochondrial localization impairs D10's mRNA translation enhancement ability**

373 D10 could promote mRNA translation, especially for mRNAs with a 5'-poly(A) leader, a feature  
374 of all poxvirus mRNAs expressed after viral DNA replication [35]. The enhancement is more  
375 notable for RNA without a 5'-m<sup>7</sup>G cap and could be revealed in the absence of VACV infection  
376 [35]. We employed an RNA-based luciferase reporter described previously [41, 42]. We used  
377 293T cells in these experiments as we found this cell line had the highest transfection efficiency  
378 in the cells we tested. *In vitro* transcribed firefly luciferase (FLuc) RNA with a 5'-poly(A) leader  
379 and m<sup>7</sup>G-cap and renilla luciferase (RLuc) RNA with a 5'-UTR containing Kozak sequence and  
380 m<sup>7</sup>G-capped were con-transfected in cells with expression of wild-type D10 or its mutants.  
381 Notably, all those containing mitochondrial localization sequence promoted 5'-poly(A) leader-  
382 mediated translation, while those without mitochondrial localization sequence significantly

383 reduced the translation enhancement (**Fig. 7ABC**). ApppG-capped RNA translation only occurs  
 384 in a cap-independent manner [43, 44]. The same trends were observed when ApppG-capped,  
 385 5'-poly(A) leader Fluc mRNA was used, although the translation enhancement was much higher  
 386 than m<sup>7</sup>G-capped RNA (**Fig 7DEF**). Together, our results show that the mitochondrial  
 387 localization is required for D10 to stimulate 5'-poly(A) leader mRNA translation, including cap-  
 388 independent translation enhancement.

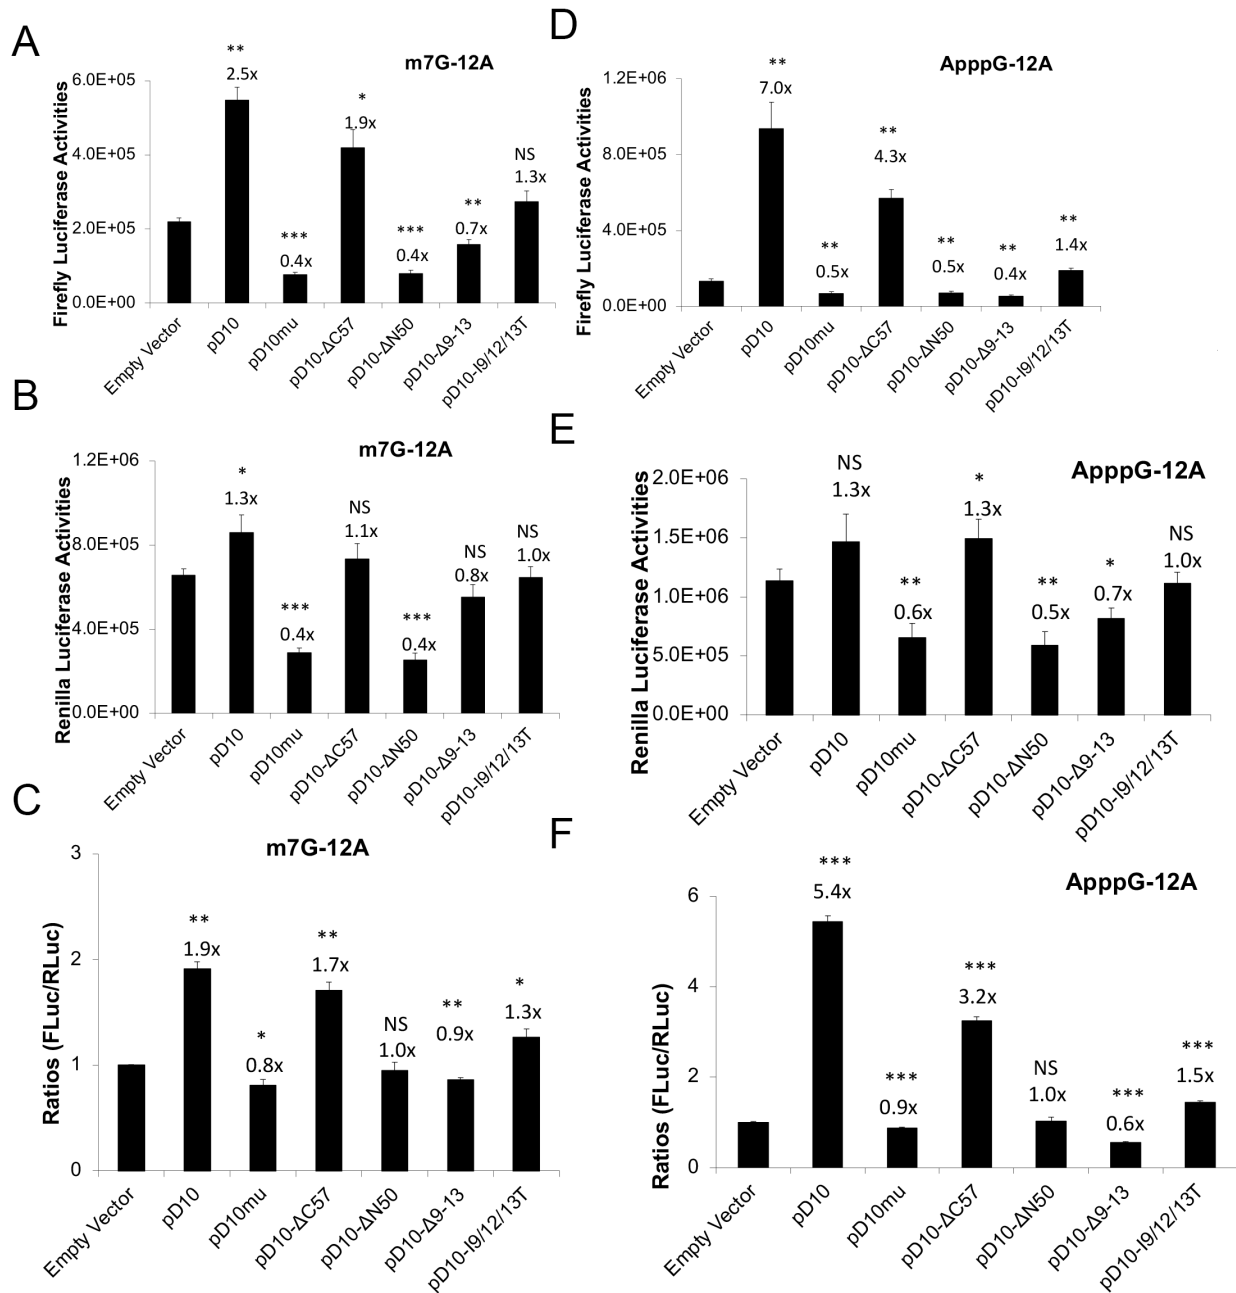

389



390 **Fig. 7. Loss of mitochondrial targeting reduces D10's mRNA translation enhancement**  
391 **ability for both cap-dependent and cap-independent translation.**

392 **(A-C)** 293T cells were transfected with indicated plasmids. 42 h post-transfection, *in vitro*  
393 synthesized, m<sup>7</sup>G-capped 12A-Fluc and Kozak-Rluc were co-transfected into the 293T cells.  
394 Luciferase activities were measured 6 h post RNA transfection. Fluc **(A)**, Rluc **(B)**, and  
395 Fluc/Rluc ratios with the empty vector normalized to 1 **(C)** are presented. **(D-F)** 293T cells were  
396 transfected with indicated plasmids. 42 h post-transfection, *in vitro* synthesized, ApppG-capped  
397 12A-Fluc and Kozak-Rluc were co-transfected into the 293T cells. Luciferase activities were  
398 measured 6 h post RNA transfection. Fluc **(D)**, Rluc **(E)**, and Fluc/Rluc ratios with the empty  
399 vector normalized to 1 **(F)** are presented. Error bars represent the standard deviation of three  
400 replicates. Significance determined by students *t-test* where  $p > 0.05$  (ns),  $p \leq 0.05$  (\*),  $p \leq 0.01$  (\*\*),  
401  $p \leq 0.001$  (\*\*\*). The numbers above significance represent fold changes. Significance and fold  
402 changes were compared to the empty vector.

403

404 **Discussion**

405 In this study, we identified and characterized the first mitochondria-localized decapping enzyme,  
406 D10, encoded by a poxvirus, which is required for its unusual function to promote 5'-poly(A)-  
407 leader-mediated mRNA translation, including cap-independent translation enhancement. The  
408 mitochondrial localization is also necessary for D10's function to efficiently remove 5'-cap of  
409 RNAs and shut off gene expression. Consequently, mitochondrial localization is required for  
410 efficient VACV replication. We also pinpointed three hydrophobic Isoleucine residues at the N-  
411 terminus of D10 that are essential for D10's mitochondrial localization. While we do not know  
412 exactly if D10 is "in" or "on" the mitochondria, it likely resides on mitochondria such that its  
413 catalytically active Nudix decapping motif can be exposed to the cytoplasm to remove 5'-caps of  
414 mRNAs. Further study will investigate this aspect.

415

416 There are several non-exclusive mechanisms by which mitochondrial localization is required for  
417 the optimal effect of D10 to shut off gene expression (**Fig 8**). First, D10 may need to assemble  
418 decapping and/or mRNA degradation complex comprising other cellular or viral proteins on  
419 mitochondria for function. Second, parking on mitochondria efficiently concentrates D10 locally,  
420 which could amplify the decapping efficiency of D10. In fact, mounting evidence shows that  
421 many proteins can concentrate for maximal effects, such as phase separation [45]. For  
422 decapping enzymes, one model of Dcp2 function is through concentrating decapping and RNA  
423 degradation complex in P-bodies for efficient mRNA decay [14, 15, 46]. Third, mitochondria  
424 serve as the highly dynamic vehicles to transport D10 throughout the cytoplasm to more readily  
425 access mRNAs, as mitochondria are highly mobile organelles to perform their functions [47, 48].  
426 Fourth, mitochondrial localization may be required for proper conformation of D10 to remove  
427 RNA 5'-cap efficiently. Further investigations of these possibilities are ongoing.

428

429 How D10's mitochondrial localization facilitates mRNA translation, especially cap-independent  
430 translation enhancement, is thought-provoking but needs extensive investigation of D10's  
431 molecular functions in the presence and absence of VACV infection. As inactivation of its  
432 decapping activity also renders it to lose its ability to promote translation [35], the mitochondrial  
433 localization requirement for translation promotion could be partially due to its substantially  
434 reduced ability to induce mRNA degradation to release translation machinery. In the meantime,  
435 the mitochondrial localization restricts its ability to interfere with ribosome recruitment by  
436 mRNAs, either in a cap-dependent or a cap-independent manner. Because both decapping  
437 activity and mitochondria location are needed for translation promotion, these two functions  
438 likely promote mRNA translation in a synergistic manner.

439

440 In addition to being required for optimal gene expression shutoff and translation promotion,  
441 D10's mitochondrial localization can provide additional mechanisms to promote VACV

442 replication in VACV-infected cells. Notably, it provides a spatial mechanism for D10 to more  
443 readily decap cellular mRNAs (**Fig 8**). Viral factories formed during VACV infection  
444 characterized by intensive viral DNA staining are the site for viral DNA transcription, where the  
445 viral transcripts can also be translated to produce proteins [49]. As mitochondria are rarely  
446 found in the viral factories (**Figs. 1&2**), D10 less readily can access viral mRNAs in the viral  
447 factories, especially those post-replicative mRNAs transcribed after viral DNA replication. In  
448 contrast, cellular mRNAs and early viral mRNAs transcribed before viral factories formation will  
449 more likely be accessed by D10 on highly mobile mitochondria for decapping and subsequent  
450 degradation. We and others previously observed pervasive transcription initiation of the VACV  
451 genome, especially during the late time of replication [50-53]. These transcripts can be from  
452 sense and antisense strands of the viral genome. Many of these transcripts are likely small in  
453 size but still get capped. More importantly, many of them can form dsRNA. As these RNAs are  
454 less likely loaded by ribosomes and get translated, they may be more likely to escape from viral  
455 factories to be accessed by D10 on mitochondria (**Figs. 1,2**).

456

457 The almost exclusive localization to mitochondria is a true innovative mechanism for a viral  
458 decapping enzyme, which separates it from accessing some viral RNAs to destabilize mRNAs  
459 and interfere translation. Meanwhile, it can rapidly find cellular mRNAs. This is unique among  
460 currently know decapping enzymes. Human Dcp2 is predominantly in the cytoplasm, with many  
461 concentrated in P-bodies, particularly under stress [14, 15, 19, 37]. NUDT16 mainly localizes in  
462 nuclei, especially in nucleoli [21], suggesting its main function is to regulate nucleolar RNAs. A  
463 decapping enzyme from Africa Swine Fever Virus mainly localized to the endoplasmic reticulum  
464 colocalizes with RNA cap structure [54]. NUDT12 localizes to a few discrete cytoplasmic  
465 granules distinct from P-bodies for Cytoplasmic Surveillance of NAD-Capped RNAs [22]. These  
466 studies suggests diverse strategies decapping enzymes used for their functions, demanding the  
467 further investigation of these fascinating proteins.

468

469 In summary, this study identified a spatial mechanism for a poxvirus-encoded decapping  
470 enzyme to regulate mRNA metabolism and translation, resulting in a critical role in viral  
471 replication. This study also provides a new direction for decapping enzymes, a group of diverse  
472 proteins with important physiological functions.

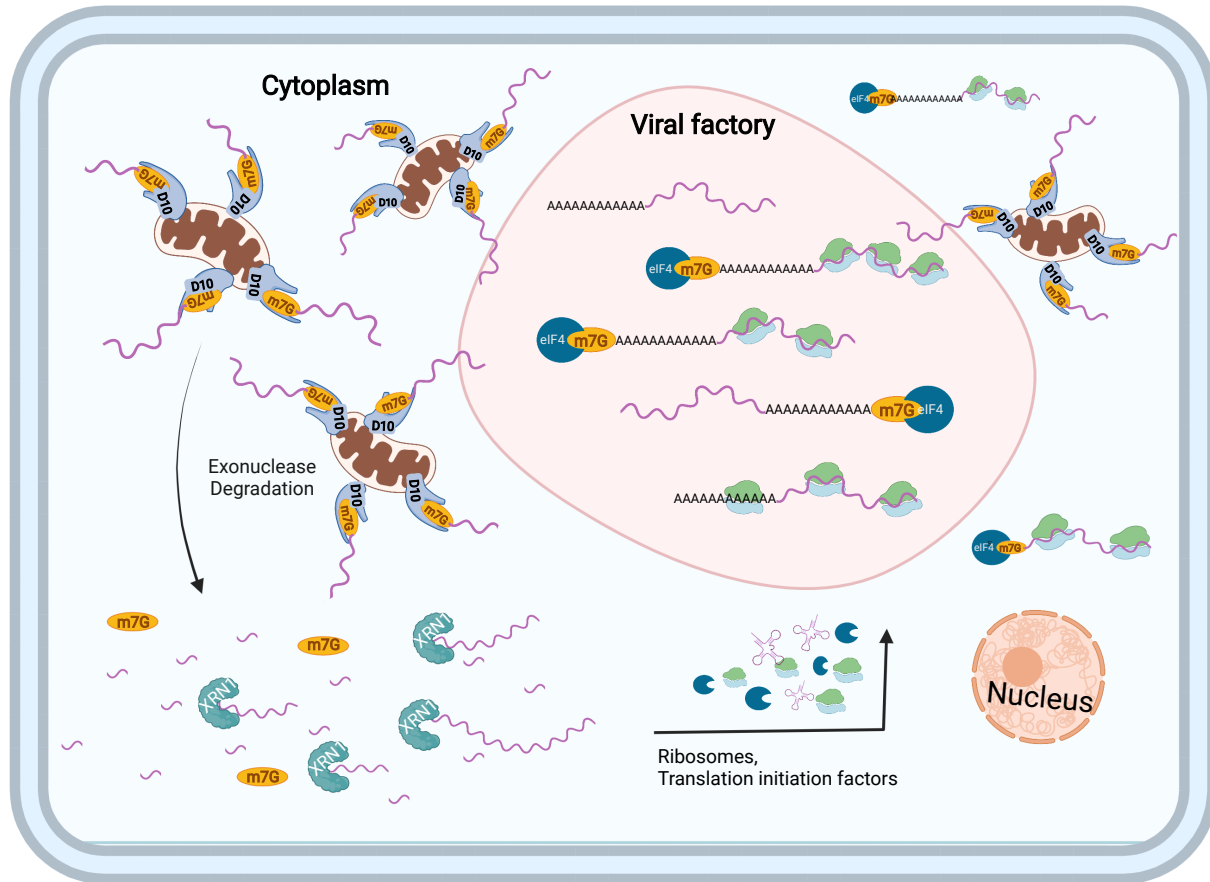

473

474 **Fig 8. A model on how D10 mitochondria localization impacts its functions.** By localizing  
475 to mitochondria, D10 (I) preferentially decaps cellular cytoplasmic mRNAs, (II) concentrates  
476 locally for powerful decapping activity, (III) rapidly mobilizes in the cytoplasm to access RNA  
477 substrates, (IV) assembles decapping and mRNA degradation complex, and (V) frees up and  
478 restricts its competition with translation machinery.

479

480 **Material and Methods**

481

482 **Cells and Viruses**

483 A549 control cells and A549 DKO cells (kind gifts from Dr. Bernard Moss [34]), Human Foreskin  
484 Fibroblasts (HFFs) (a kind gift from Dr. Nicholas Wallace), HeLa cells (ATCC CCL-2), 293T  
485 (ATCC-CRL-3216), BHK-21 (C-13), were cultured in Dulbecco's minimal essential medium  
486 (DMEM; Quality Biological). BS-C-1(ATCC CCL-26) cells were cultured in Eagles Minimal  
487 Essential Medium (EMEM, Quality Biological). The cell culture media were supplemented with  
488 10% fetal bovine serum (FBS; Peak Serum), 2 mM glutamine (Quality Biological), 100 U/ml of  
489 penicillin (Quality Biological), and 100 µg/ml streptomycin (Quality Biological). Cells grow at  
490 37°C with 5% CO<sub>2</sub>.

491

492 VACV Western Reserve (WR) strain (ATCC VR-1354) is used in this study. Other recombinant  
493 VACVs used in this study were derived from VACV WR strain. vD9muD10mu, vD10mu, vΔD10,  
494 vΔD9 were kindly provided by Dr. Bernard Moss and described elsewhere [31, 32].vD10-3xFlag  
495 expressing VACV D10 with a 3xFlag tag at the C-terminus was described previously [35].  
496 Recombinant VACVs carrying mutant D10, including vD10-Δ9-13, vD10-I9/12/13T, vΔD9-D10-  
497 Δ9to13, vΔD9-D10-I9/12/13T, were generated through homologous recombination using DNA  
498 fragments carrying indicated mutations, respectively, followed by three to four rounds of plaque  
499 purification of the recombinant viruses.

500

501 VACV and its derived recombinant viruses were grown in HeLa or A549DKO cells and purified  
502 on 36% sucrose gradient. The viruses (except for vD9muD10mu) were titrated using a plaque  
503 assay as described elsewhere [55]. The vD9muD10mu was titrated in A549DKO cells as  
504 described elsewhere using anti-VACV antibody immune staining [32, 55].

505

## 506 **Virus infection and plaque assay**

507 Virus infection was performed with DMEM or EMEM containing 2.5% FBS. Virus was sonicated  
508 and diluted according to the indicated MOI. Medium containing desired amounts of viruses was  
509 added to the cultured cells and incubated at 37°C for 1 h and replaced with fresh medium. For  
510 plaque assay, virus-containing-samples were 10-fold serial diluted and added on top of BS-C-1  
511 cells in 12-well plates. After 1 h of incubation at 37°C, the medium was replaced with fresh  
512 medium containing 0.5% methylcellulose (Fisher Scientific). Plaques were visualized by staining  
513 the infected cells in 12-well plates with 20% ethanol containing 0.1% crystal violet for 5 min.

514

515 To compare plaque sizes, the diameters of twenty-five representative plaques of each virus  
516 were picked and measured with Image J software.

517

## 518 **Antibodies and Chemicals**

519 Mouse  $\alpha$ -Flag monoclonal antibody (used for Western blotting analysis) was purchased from  
520 Sigma-Aldrich (F3165). Rabbit  $\alpha$ -Flag polyclonal antibody (used immunostaining for confocal  
521 microscopy) was purchased from Thermo Fisher Scientific (PA1-984B). Mouse  $\alpha$ -Tom20  
522 antibody (sc-17764) and mouse  $\alpha$ -GAPDH antibody (sc-365062 HRP) were purchased from  
523 Santa Cruz Biotechnology. Rabbit  $\alpha$ -VACV and rabbit  $\alpha$ -A7 antibodies were kindly provided by  
524 Dr. Bernard Moss [56]. Mouse  $\alpha$ -E3 and mouse  $\alpha$ -D13 antibodies were kindly provided by Dr.  
525 Yan Xiang [57]. Mouse  $\alpha$ -Cap antibody (201-001) was purchased from Synaptic Systems.  
526 MitoTracker (M7510) was purchased from Thermo Fisher Scientific.

## 527 **RNA extraction and qRT-PCR**

528 Trizol reagent (Fisher Scientific, 15-596-018) was used for RNA extraction following product  
529 instructions. Five  $\mu$ g of RNA was used for reverse transcription with SuperScript III Reverse

530 Transcriptase kit (Fisher Scientific, 18-080-044) following product instructions, using random  
531 hexamers as the primers. Quantitative PCR was performed using All-in-one qPCR Mix  
532 (GeneCopoeia, QP005) with primers specific for E3L, D13L, A7L, GADPH, and 18s rRNA.

533

#### 534 **Plasmids and transfection**

535 Plasmids encode D10 mutants are illustrated in Fig 2A and include: pD10- $\Delta$ N8, pD10- $\Delta$ N13,  
536 pD10- $\Delta$ N34, pD10- $\Delta$ N50, pD10- $\Delta$ C57, pD10- $\Delta$ 9-13, pD10-I9/12/13T. These plasmids were  
537 generated using Q5 Site-Directed Mutagenesis Kit (New England Biolabs, E0554)  
538 instructions based on the previously described codon-optimized pD10-3xFlag according to  
539 the manufacturer's [35]. According to the manufacturer's instructions, plasmid transfection  
540 was carried out using lipofectamine 2000 (ThermoFisher scientific, 11668019).

541

#### 542 **Western Blotting Analysis**

543 Western blot was performed as described previously [58]. Briefly, the samples were resolved by  
544 sodium dodecyl sulfate-polyacrylamide gel electrophoresis (SDS-PAGE), followed by  
545 transferring to a polyvinylidene difluoride membrane (PVDF). The PVDF membrane was  
546 blocked with 2% BSA or 5% milk plus 1% BSA at room temperature for 1 h, then incubated with  
547 primary antibodies in the same blocking buffer at room temperature for 1 h or at 4°C overnight.  
548 After washing with TBST three times, membranes were incubated with secondary antibodies at  
549 room temperature for 1 h and washed three times with TBST. Before imaging, the membrane  
550 was developed using SuperSignal West Femto Maximum Sensitivity Substrate (Thermo Fisher  
551 Scientific, 34094). Antibodies were stripped from the membrane by Restore Western Blot  
552 stripping buffer (Thermo Fisher Scientific, 21059) for analysis using another antibody.

553

#### 554 **Immunostaining and confocal microscope**

555 Mock, VACV-infected or-plasmids transfected cells were fixed with 4% paraformaldehyde  
556 solution for 30 min at room temperature. The cell membrane was penetrated with 1xPBS  
557 containing 0.5% TritonX-100 for 10 min following being blocked with 1xPBS containing 2% BSA  
558 for 1 h. Primary antibodies were diluted in PBS (with 2% BSA) and incubated with cells for 1 h at  
559 room temperature. After three times of washing with 1xPBS, cells were incubated with  
560 secondary Alexa Fluor (488 nm for green and 594 nm for red)-conjugated IgG diluted in 1x PBS  
561 (with 2% BSA) at room temperature for 1 h. After three times of washing with 1xPBS, cells were  
562 stained with DAPI for 5 min and washed with 1xPBS two more times. Coverslips were mounted  
563 using 40% glycerol. Zeiss 880 or Zeiss 700 confocal microscopy was used to visualize the cells.

564

#### 565 ***In vitro* RNA synthesis, transfection, and luciferase assay**

566 Synthesis of RNA *in vitro* was carried out as previously described using HiScribe T7 Quick High  
567 Yield RNA Synthesis Kit (New England Biolabs, E2050) [35, 41, 42]. The RNAs were co-  
568 transcriptionally capped with m<sup>7</sup>G anti-reverse cap analog or ApppG Cap Analog (New England  
569 Biolabs, 1411 and Cat#1406). The RNAs were purified using a Purelink RNA Mini Kit (Thermo  
570 Fisher Scientific, 12183025) and transfected into cells using Lipofectamine 2000 (Thermo Fisher  
571 Scientific, L11668019) according to the manufacturer's instructions. Six hours post-transfection,  
572 cell lysates were collected, and luciferase activities were measured using a Dual-Luciferase  
573 Reporter Assay System (Promega, E1960) and GloMax Navigator Microplate Luminometer with  
574 dual injectors (Promega) as per manufacturer protocol.

575

#### 576 ***Gaussia* luciferase assay**

577 The *Gaussia* luciferase activities were measured using a luminometer using the Pierce *Gaussia*  
578 luciferase flash assay kit (Thermo Scientific, 16158).

#### 579 **Statistical analysis**



580 The student's *t*-test was performed to evaluate statistical differences from at least three  
581 replicates. We used the following convention for symbols to indicate statistical significance:  
582 ns,  $P > 0.05$ ; \*,  $P \leq 0.05$ ; \*\*,  $P \leq 0.01$ ; \*\*\*,  $P \leq 0.001$ ; \*\*\*\*,  $P \leq 0.0001$ .

### 583 **Acknowledgment**

584 We thank Bernard Moss, Yan Xiang, and Nicholas Wallace for providing reagents and  
585 materials. We thank Joel Sanneman at Kansas State University CVM Confocal Facility for  
586 technical assistance. ZY is supported by a grant from the National Institutes of Health (R01  
587 AI143709).

588

### 589 **References**

- 590 1. Cougot, N., et al., '*Cap-tabolism*'. Trends Biochem Sci, 2004. **29**(8): p. 436-44.
- 591 2. Grudzien-Nogalska, E. and M. Kiledjian, *New insights into decapping enzymes and*  
592 *selective mRNA decay*. Wiley Interdiscip Rev RNA, 2017. **8**(1).
- 593 3. Kunar, R. and J.K. Roy, *The mRNA decapping protein 2 (DCP2) is a major regulator of*  
594 *developmental events in Drosophila-insights from expression paradigms*. Cell Tissue  
595 Res, 2021.
- 596 4. Adachi, T., K. Nagahama, and S. Izumi, *The C. elegans mRNA decapping enzyme shapes*  
597 *morphology of cilia*. Biochem Biophys Res Commun, 2017. **493**(1): p. 382-387.
- 598 5. Gaviraghi, M., et al., *Tumor suppressor PNRC1 blocks rRNA maturation by recruiting*  
599 *the decapping complex to the nucleolus*. EMBO J, 2018. **37**(23).
- 600 6. Grudzien-Nogalska, E., et al., *Nudt3 is an mRNA decapping enzyme that modulates cell*  
601 *migration*. RNA, 2016. **22**(5): p. 773-81.
- 602 7. Wu, C., et al., *Overexpression of mRNA-decapping enzyme 1a affects survival rate in*  
603 *colorectal carcinoma*. Oncol Lett, 2018. **16**(1): p. 1095-1100.

- 604 8. Bessman, M.J., D.N. Frick, and S.F. O'Handley, *The MutT proteins or "Nudix"*  
605 *hydrolases, a family of versatile, widely distributed, "housecleaning" enzymes*. J Biol  
606 Chem, 1996. **271**(41): p. 25059-62.
- 607 9. Li, Y. and M. Kiledjian, *Regulation of mRNA decapping*. Wiley Interdiscip Rev RNA,  
608 2010. **1**(2): p. 253-65.
- 609 10. Arribas-Layton, M., et al., *Structural and functional control of the eukaryotic mRNA*  
610 *decapping machinery*. Biochim Biophys Acta, 2013. **1829**(6-7): p. 580-9.
- 611 11. Ling, S.H., R. Qamra, and H. Song, *Structural and functional insights into eukaryotic*  
612 *mRNA decapping*. Wiley Interdiscip Rev RNA, 2011. **2**(2): p. 193-208.
- 613 12. Lykke-Andersen, J., *Identification of a human decapping complex associated with hUpf*  
614 *proteins in nonsense-mediated decay*. Mol Cell Biol, 2002. **22**(23): p. 8114-21.
- 615 13. Dunkley, T. and R. Parker, *The DCP2 protein is required for mRNA decapping in*  
616 *Saccharomyces cerevisiae and contains a functional MutT motif*. EMBO J, 1999. **18**(19):  
617 p. 5411-22.
- 618 14. Wang, Z., et al., *The hDcp2 protein is a mammalian mRNA decapping enzyme*. Proc Natl  
619 Acad Sci U S A, 2002. **99**(20): p. 12663-8.
- 620 15. van Dijk, E., et al., *Human Dcp2: a catalytically active mRNA decapping enzyme located*  
621 *in specific cytoplasmic structures*. EMBO J, 2002. **21**(24): p. 6915-24.
- 622 16. Borbolis, F. and P. Syntichaki, *Biological implications of decapping: beyond bulk mRNA*  
623 *decay*. FEBS J, 2021.
- 624 17. Dobrzanska, M., et al., *Cloning and characterization of the first member of the Nudix*  
625 *family from Arabidopsis thaliana*. J Biol Chem, 2002. **277**(52): p. 50482-6.

- 626 18. McLennan, A.G., *The Nudix hydrolase superfamily*. Cell Mol Life Sci, 2006. **63**(2): p.  
627 123-43.
- 628 19. Parker, R. and U. Sheth, *P bodies and the control of mRNA translation and degradation*.  
629 Mol Cell, 2007. **25**(5): p. 635-46.
- 630 20. Luo, Y., Z. Na, and S.A. Slavoff, *P-Bodies: Composition, Properties, and Functions*.  
631 Biochemistry, 2018. **57**(17): p. 2424-2431.
- 632 21. Peculis, B.A., K. Reynolds, and M. Cleland, *Metal determines efficiency and substrate*  
633 *specificity of the nuclear NUDIX decapping proteins X29 and H29K (Nudt16)*. J Biol  
634 Chem, 2007. **282**(34): p. 24792-805.
- 635 22. Wu, H., et al., *Decapping Enzyme NUDT12 Partners with BLMH for Cytoplasmic*  
636 *Surveillance of NAD-Capped RNAs*. Cell Rep, 2019. **29**(13): p. 4422-4434 e13.
- 637 23. Parrish, S., et al., *The African swine fever virus g5R protein possesses mRNA decapping*  
638 *activity*. Virology, 2009. **393**(1): p. 177-82.
- 639 24. Parrish, S., W. Resch, and B. Moss, *Vaccinia virus D10 protein has mRNA decapping*  
640 *activity, providing a mechanism for control of host and viral gene expression*. Proc Natl  
641 Acad Sci U S A, 2007. **104**(7): p. 2139-44.
- 642 25. Parrish, S. and B. Moss, *Characterization of a second vaccinia virus mRNA-decapping*  
643 *enzyme conserved in poxviruses*. J Virol, 2007. **81**(23): p. 12973-8.
- 644 26. Yutin, N., et al., *Eukaryotic large nucleo-cytoplasmic DNA viruses: clusters of*  
645 *orthologous genes and reconstruction of viral genome evolution*. Virol J, 2009. **6**: p. 223.
- 646 27. Moss, B., *Poxviridae: The viruses and their replication*. Fields Virology, eds, Knipe DM,  
647 Howley PM, 2013. **2**: p. 2129-2159.

- 648 28. Yang, Z., M. Gray, and L. Winter, *Why do poxviruses still matter?* Cell & Bioscience,  
649 2021. **11**(1): p. 96.
- 650 29. Parrish, S. and B. Moss, *Characterization of a vaccinia virus mutant with a deletion of*  
651 *the D10R gene encoding a putative negative regulator of gene expression.* J Virol, 2006.  
652 **80**(2): p. 553-61.
- 653 30. Shors, T., J.G. Keck, and B. Moss, *Down regulation of gene expression by the vaccinia*  
654 *virus D10 protein.* J Virol, 1999. **73**(1): p. 791-6.
- 655 31. Liu, S.W., et al., *The D10 decapping enzyme of vaccinia virus contributes to decay of*  
656 *cellular and viral mRNAs and to virulence in mice.* J Virol, 2014. **88**(1): p. 202-11.
- 657 32. Liu, S.W., et al., *Poxvirus decapping enzymes enhance virulence by preventing the*  
658 *accumulation of dsRNA and the induction of innate antiviral responses.* Cell Host  
659 Microbe, 2015. **17**(3): p. 320-31.
- 660 33. Erez, N., et al., *Spontaneous and Targeted Mutations in the Decapping Enzyme Enhance*  
661 *Replication of Modified Vaccinia Virus Ankara (MVA) in Monkey Cells.* J Virol, 2021.  
662 **95**(19): p. e0110421.
- 663 34. Liu, R. and B. Moss, *Opposing Roles of Double-Stranded RNA Effector Pathways and*  
664 *Viral Defense Proteins Revealed with CRISPR-Cas9 Knockout Cell Lines and Vaccinia*  
665 *Virus Mutants.* J Virol, 2016. **90**(17): p. 7864-79.
- 666 35. Cantu, F., et al., *Poxvirus-encoded decapping enzymes promote selective translation of*  
667 *viral mRNAs.* PLoS Pathog, 2020. **16**(10): p. e1008926.
- 668 36. Ingelfinger, D., et al., *The human LSM1-7 proteins colocalize with the mRNA-degrading*  
669 *enzymes Dcp1/2 and Xrn1 in distinct cytoplasmic foci.* RNA, 2002. **8**(12): p. 1489-501.

- 670 37. Eulalio, A., I. Behm-Ansmant, and E. Izaurralde, *P bodies: at the crossroads of post-*  
671 *transcriptional pathways*. Nat Rev Mol Cell Biol, 2007. **8**(1): p. 9-22.
- 672 38. Ding, L., et al., *The developmental timing regulator AIN-1 interacts with miRISCs and*  
673 *may target the argonaute protein ALG-1 to cytoplasmic P bodies in C. elegans*. Mol Cell,  
674 2005. **19**(4): p. 437-47.
- 675 39. Sheth, U. and R. Parker, *Decapping and decay of messenger RNA occur in cytoplasmic*  
676 *processing bodies*. Science, 2003. **300**(5620): p. 805-8.
- 677 40. Goping, I.S., D.G. Millar, and G.C. Shore, *Identification of the human mitochondrial*  
678 *protein import receptor, huMas20p. Complementation of delta mas20 in yeast*. FEBS  
679 Lett, 1995. **373**(1): p. 45-50.
- 680 41. Dhungel, P., et al., *In Vitro Transcribed RNA-based Luciferase Reporter Assay to Study*  
681 *Translation Regulation in Poxvirus-infected Cells*. J Vis Exp, 2019(147).
- 682 42. Dhungel, P., S. Cao, and Z. Yang, *The 5'-poly(A) leader of poxvirus mRNA confers a*  
683 *translational advantage that can be achieved in cells with impaired cap-dependent*  
684 *translation*. PLoS Pathog, 2017. **13**(8): p. e1006602.
- 685 43. Zhou, J., et al., *Dynamic m(6)A mRNA methylation directs translational control of heat*  
686 *shock response*. Nature, 2015. **526**(7574): p. 591-4.
- 687 44. Gilbert, W.V., et al., *Cap-independent translation is required for starvation-induced*  
688 *differentiation in yeast*. Science, 2007. **317**(5842): p. 1224-7.
- 689 45. Nesterov, S.V., N.S. Ilyinsky, and V.N. Uversky, *Liquid-liquid phase separation as a*  
690 *common organizing principle of intracellular space and biomembranes providing*  
691 *dynamic adaptive responses*. Biochim Biophys Acta Mol Cell Res, 2021. **1868**(11): p.  
692 119102.

- 693 46. Franks, T.M. and J. Lykke-Andersen, *The control of mRNA decapping and P-body*  
694 *formation*. Mol Cell, 2008. **32**(5): p. 605-15.
- 695 47. Alberts B, J.A., Lewis J, et al., *The Mitochondrion*, in *Molecular Biology of the Cell. 4th*  
696 *edition.*, J.A. Alberts B, Lewis J, et al., Editor. 2002, Garland Science: New York.
- 697 48. Zhao, C., et al., *Charcot-Marie-Tooth disease type 2A caused by mutation in a*  
698 *microtubule motor KIF1Bbeta*. Cell, 2001. **105**(5): p. 587-97.
- 699 49. Katsafanas, G.C. and B. Moss, *Colocalization of transcription and translation within*  
700 *cytoplasmic poxvirus factories coordinates viral expression and subjugates host*  
701 *functions*. Cell Host Microbe, 2007. **2**(4): p. 221-8.
- 702 50. Yang, Z., et al., *Pervasive initiation and 3'-end formation of poxvirus postreplicative*  
703 *RNAs*. J Biol Chem, 2012. **287**(37): p. 31050-60.
- 704 51. Yang, Z., et al., *Genome-wide analysis of the 5' and 3' ends of vaccinia virus early*  
705 *mRNAs delineates regulatory sequences of annotated and anomalous transcripts*. J Virol,  
706 2011. **85**(12): p. 5897-909.
- 707 52. Yang, Z., et al., *Simultaneous high-resolution analysis of vaccinia virus and host cell*  
708 *transcriptomes by deep RNA sequencing*. Proc Natl Acad Sci U S A, 2010. **107**(25): p.  
709 11513-8.
- 710 53. Lu, C. and R. Bablanian, *Characterization of small nontranslated polyadenylylated RNAs*  
711 *in vaccinia virus-infected cells*. Proc Natl Acad Sci U S A, 1996. **93**(5): p. 2037-42.
- 712 54. Quintas, A., et al., *Characterization of the African Swine Fever Virus Decapping Enzyme*  
713 *during Infection*. Journal of Virology, 2017. **91**(24).
- 714 55. Cotter, C.A., et al., *Preparation of Cell Cultures and Vaccinia Virus Stocks*. Curr Protoc  
715 Protein Sci, 2017. **89**: p. 5 12 1-5 12 18.

- 716 56. Gershon, P.D. and B. Moss, *Early transcription factor subunits are encoded by vaccinia*  
717 *virus late genes*. Proc Natl Acad Sci U S A, 1990. **87**(11): p. 4401-5.
- 718 57. Meng, X., et al., *Generation and characterization of a large panel of murine monoclonal*  
719 *antibodies against vaccinia virus*. Virology, 2011. **409**(2): p. 271-9.
- 720 58. Pant, A., et al., *Viral growth factor- and STAT3 signaling-dependent elevation of the TCA*  
721 *cycle intermediate levels during vaccinia virus infection*. PLoS Pathog, 2021. **17**(2): p.  
722 e1009303.
- 723  
724  
725  
726  
727  
728  
729  
730  
731  
732  
733  
734  
735  
736  
737  
738  
739  
740

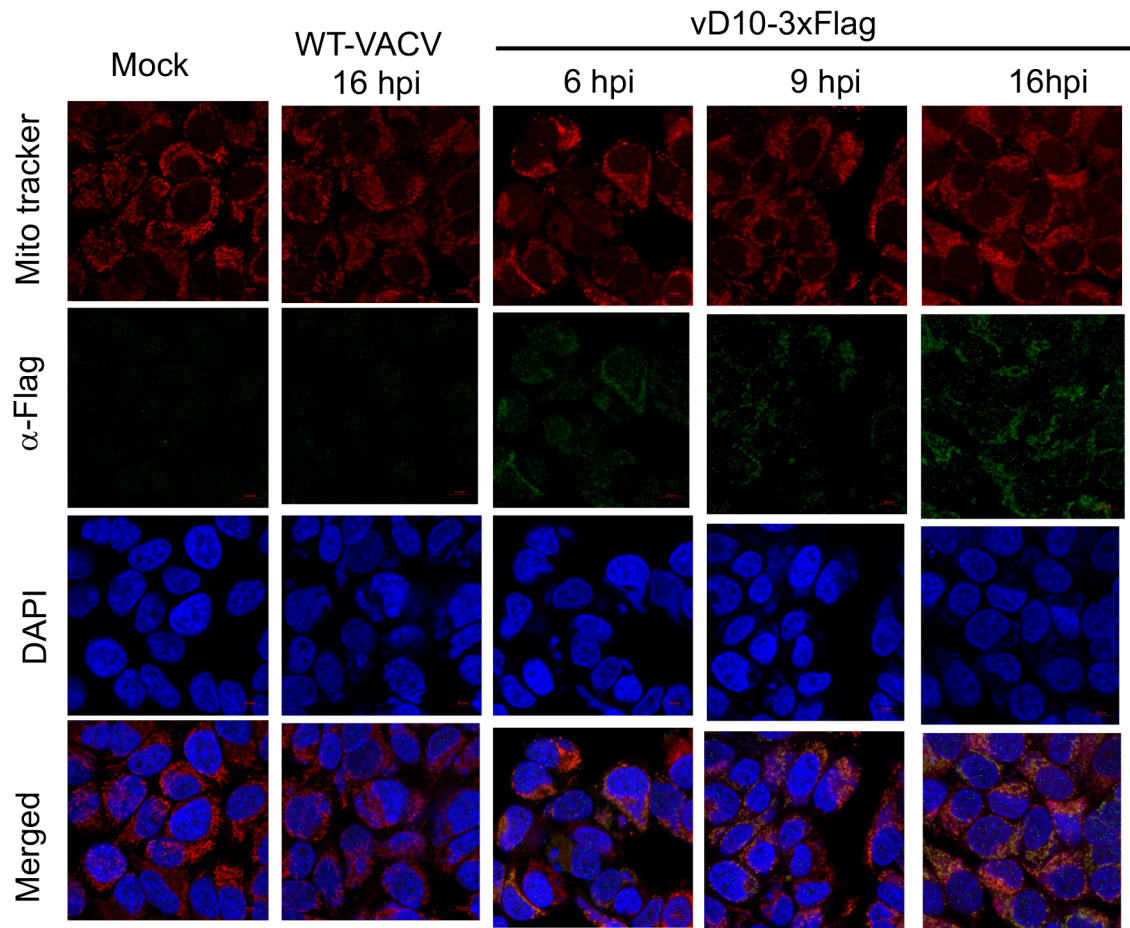

741

742

743 **Fig S1.** D10 localizes to mitochondria in HeLa cells during infection. HeLa cells were infected

744 with vD10-3xFlag, or WT-VACV, or mock-infected. Confocal microscopy was used to visualize

745 D10 ( $\alpha$ -Flag antibody, green), mitochondria (MitoTracker, red), and DNA (DAPI, blue) at 6, 9,

746 and 16 hpi.

747

748

749

750

751



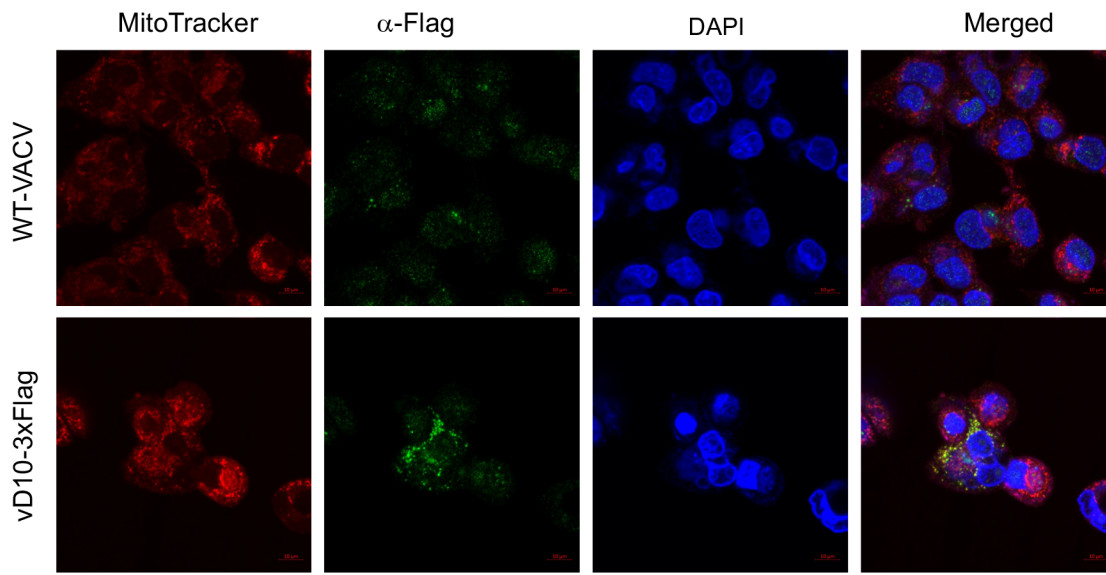

752

753 **Fig S2.** D10 localizes to mitochondria in A549DKO cells during infection. A549DKO cells were

754 infected with vD10-3xFlag or WT-VACV. Confocal microscopy was employed to visualize D10

755 ( $\alpha$ -Flag antibody, green), mitochondria (MitoTracker, red), and DNA (DAPI, blue) at 16 hpi.

756

757

758

759

760

761

762

763

764

765

766

767

768

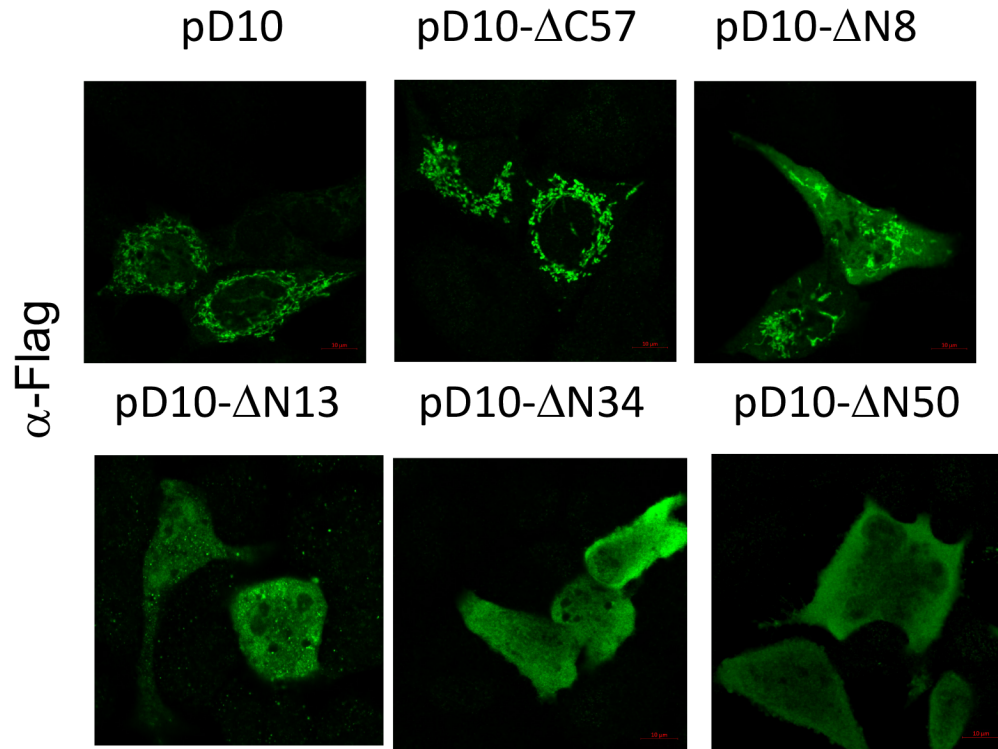

769

770 **Fig S3.** D10 mitochondrial signal is located at the N-terminus of D10. A549 DKO cells were  
771 transfected with a plasmid expressing indicated codon-optimized D10 truncation mutants with  
772 C-terminal 3xFlag. Confocal microscopy was employed to visualize D10 or its mutants using  
773  $\alpha$ -Flag antibody (green).

774

775

776

777

778

779

780

781

782

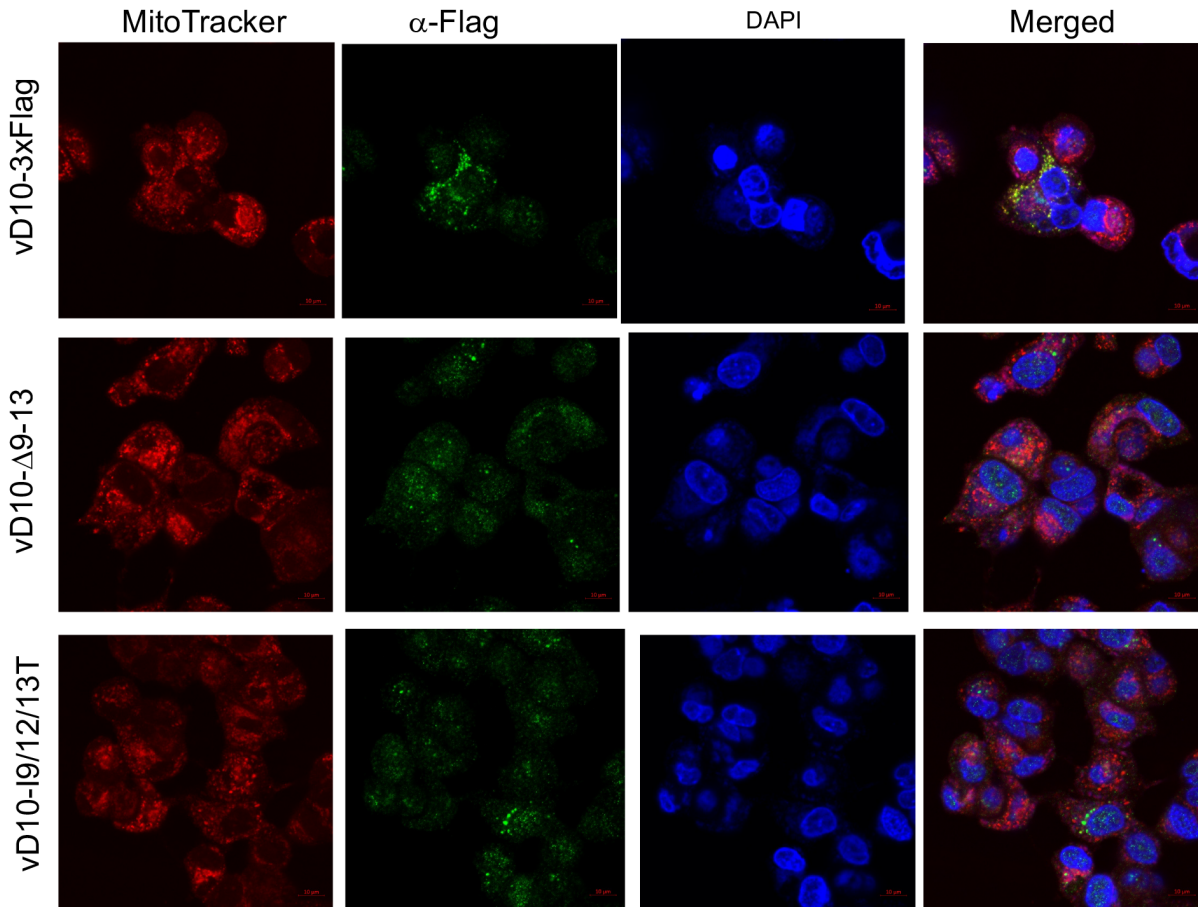

783

784 **Fig S4.** D10 mutants with amino acids 9-13 deletion or mutation expressed from recombinant

785 VACV do not localize to mitochondria during infection, A549DKO cells were infected with

786 indicated recombinant VACVs (MOI=3) encoding D10 mutants with a C-terminal 3xFlag tag.

787 Confocal microscopy was used to visualize D10 ( $\alpha$ -Flag antibody, green), mitochondria

788 (MitoTracker, red), and DNA (DAPI, blue) at 16 hpi.

789

790

791

792

793

794

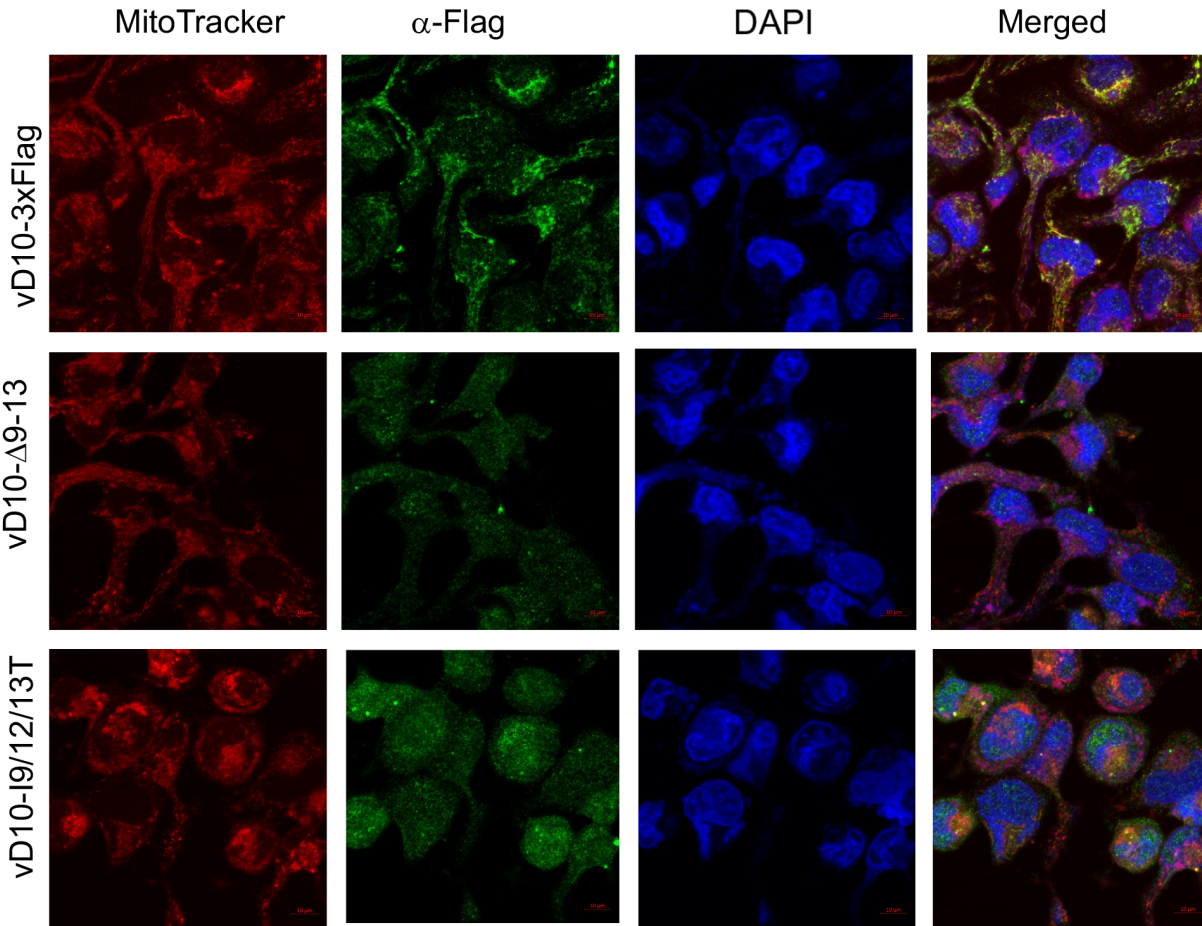

795

796 **Fig S5.** D10 mutants with amino acids 9-13 deletion or mutation expressed from recombinant  
797 VACV do not localize to mitochondria during infection. HeLa cells were infected with indicated  
798 recombinant VACVs (MOI=3) encoding D10 mutants with a C-terminal 3xFlag tag. Confocal  
799 microscopy was used to visualize D10 ( $\alpha$ -Flag antibody, green), mitochondria MitoTracker, red),  
800 and DNA (DAPI, blue) at 16 hpi.

801

802

803

804

805

806

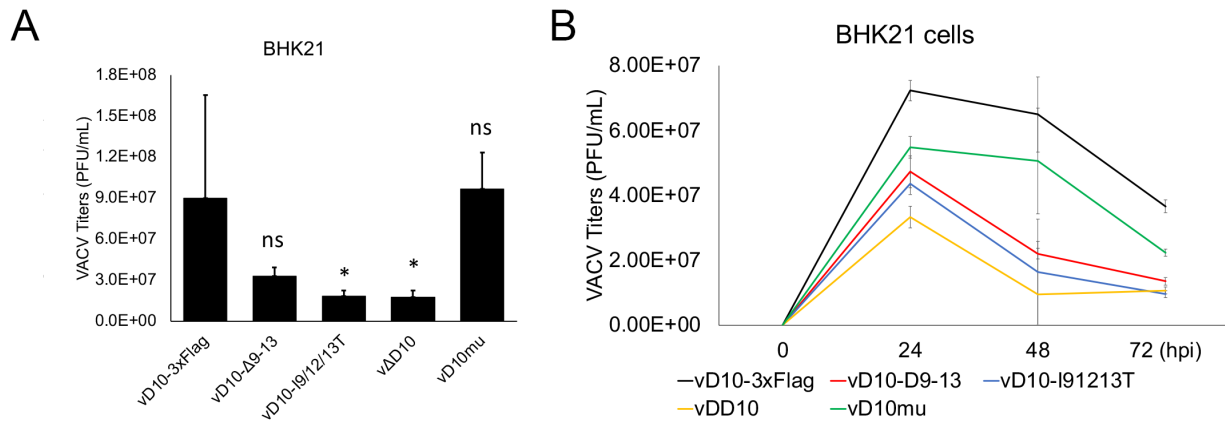

807

808 **Fig S6.** BHK-21 cells were infected with indicated viruses at an MOI of 3 (**A**) or 0.001 (**B**). Viral

809 titers were determined using a plaque assay at indicated times post-infection. All the viruses

810 used encode D9. Error bars represent the standard deviation of at least three replicates. ns,

811  $P > 0.05$ ; \*,  $P \leq 0.05$ . Significance was compared to vD10-3xFlag.

812
